# Allele frequency spectra in structured populations: Novel-allele probabilities under the labelled coalescent

Marcy K. Uyenoyama<sup>§</sup>  
Naoki Takebayashi\*  
Seiji Kumagai<sup>§</sup>

<sup>§</sup>Department of Biology, Box 90338,  
Duke University, Durham, NC 27708-0338, USA

\*Department of Biology and Wildlife, Institute of Arctic Biology,  
University of Alaska Fairbanks, Fairbanks, AK 99775-7000, USA

Corresponding author:

Marcy K. Uyenoyama  
Department of Biology  
Box 90338  
Duke University  
Durham, NC 27708-0338  
USA

Tel: 919-660-7350  
Fax: 919-660-7293  
e-mail: [marcy@duke.edu](mailto:marcy@duke.edu)

## ABSTRACT

We address the effect of population structure on key properties of the Ewens sampling formula. We use our previously-introduced inductive method for determining exact allele frequency spectrum (AFS) probabilities under the infinite-allele model of mutation and population structure for samples of arbitrary size. Fundamental to the sampling distribution is the novel-allele probability, the probability that given the pattern of variation in the present sample, the next gene sampled belongs to an as-yet-unobserved allelic class. Unlike the case for panmictic populations, the novel-allele probability depends on the AFS of the present sample. We derive a recursion that directly provides the marginal novel-allele probability across AFSs, obviating the need first to determine the probability of each AFS. Our explorations suggest that the marginal novel-allele probability tends to be greater for initial samples comprising fewer alleles and for sampling configurations in which the next-observed gene derives from a deme different from that of the majority of the present sample. Comparison to the efficient importance sampling proposals developed by De Iorio and Griffiths and colleagues indicates that their approximation for the novel-allele probability generally agrees with the true marginal, although it may tend to overestimate the marginal in cases in which the novel-allele probability is high and migration rates are low.

**Keywords:** Ewens sampling formula; allele frequency spectrum; population structure; importance sampling; coalescence; infinite-allele mutation

# 1 Introduction

Denote the allele frequency spectrum (AFS) of a sample of  $n$  genes at a single, non-recombining locus by

$$\mathbf{a} = \{a_1, a_2, \dots, a_n\},$$

in which  $a_i$  represents the number of alleles observed in multiplicity  $i$ . Under the infinite-alleles model of mutation, for which each mutational event generates a novel allelic class, the Ewens Sampling Formula (ESF, Ewens 1972) provides the probability of AFS  $\mathbf{a}$  in the absence of population structure:

$$p_n(\mathbf{a}) = \frac{n!}{\theta(\theta+1)\dots(\theta+n-1)} \prod_{i=1}^n \left(\frac{\theta}{i}\right)^{a_i} \frac{1}{a_i!}, \quad (1)$$

for  $p_n(\mathbf{a}) = \Pr(\mathbf{a}|\Phi)$  with  $\Phi = \{\theta\}$ , the scaled rate of mutation,

$$\theta = \lim_{\substack{N \rightarrow \infty \\ u \rightarrow 0}} 4Nu, \quad (2)$$

in which  $u$  represents the per-gene, per-generation rate of mutation and  $2N$  the number of genes in the population eligible to leave descendants.

The publication in *Theoretical Population Biology* of the ESF numbers among the watershed moments in evolutionary genetics. Kingman (2000) has recognized this breakthrough as a factor that precipitated the development of coalescence theory. It may still be not widely appreciated that the recursion developed by Karlin and McGregor (1972) to support the ESF is a coalescence argument. Moreover, their argument describes a *labelled* coalescence process, under which the observed pattern of genetic variation provides information about the genealogical history of a sample immediately ancestral to the most recent evolutionary event.

In a remarkable paper, Stephens and Donnelly (2000) elucidated the significance of insights gained from the ESF for the genealogical history of a sample of genes. It unified

19 a number of approaches, notably importance sampling (IS), to the determination of the  
20 likelihood of an evolutionary model. In particular, the Griffiths-Tavaré approach (*e.g.*, Grif-  
21 fiths and Tavaré 1994b) to solving recursions in likelihoods corresponds to an IS procedure  
22 (Felsenstein *et al.* 1999; Stephens and Donnelly 2000). Under this approach, backward-  
23 in-time sequences of ancestral samples culminating in the most recent common ancestor  
24 (MRCA) of the sample are proposed using the evolutionary rates of the forward-in-time pro-  
25 cess. Drawing on properties of the ESF, Stephens and Donnelly (2000) developed a new and  
26 more efficient class of IS proposals by connecting the distribution of the immediate ancestor  
27 of a sample to the distribution of the next-observed gene conditional on that sample.

28 Within this class of IS proposals are those developed by De Iorio and Griffiths and  
29 colleagues (*e.g.*, De Iorio and Griffiths 2004a,b; De Iorio *et al.* 2005) for general models  
30 of mutation in structured populations. Their highly-efficient family of proposals draws on  
31 properties of the ESF to approximate the novel-allele probability: the probability the next-  
32 observed gene represents a novel allelic class, given the AFS of the present sample.

33 We have developed an inductive method for determining the probabilities of all possible  
34 allele frequency spectra (AFSs) under the infinite-alleles model of mutation for a two-deme  
35 population (Uyenoyama *et al.* 2019). While our model constitutes perhaps the simplest  
36 within the domain addressed by De Iorio and Griffiths and colleagues, it is the only case  
37 beyond the ESF itself for which exact AFS probabilities are known. Here, we compare the  
38 actual distribution of the immediate ancestor of a sample to their IS proposals. As this family  
39 of proposals, including that of Stephens and Donnelly (2000), is based on characterizing the  
40 distribution of the next-sampled gene, we address in particular the probability that the  
41 next-sampled gene represents a novel allelic class.

42 Key to the IS proposals is the approximation that the novel-allele probability is indepen-  
43 dent of the AFS of the present sample. Our previous study (Uyenoyama *et al.* 2019) showed  
44 that this signature property of the ESF is not preserved under population structure. An  
45 unanticipated finding of our present analysis is that the approximate novel-allele probability

46 of De Iorio and Griffiths and colleagues is in fact similar to the marginal novel-allele prob-  
47 ability, the mean novel-allele probability over all possible AFSs of the sample to which the  
48 last gene is added.

49 We begin with a review of a number of coalescence-based methods that exploit the  
50 information contained in the pattern of genetic variation observed in a sample of genes  
51 to characterize the ancestor of the sample. We then enumerate some key properties of  
52 the ESF for unstructured populations and address the extent to which those properties  
53 are preserved under population structure. For a two-deme population under infinite-alleles  
54 mutation, we explore qualitative trends in the novel-allele probability and assess the IS  
55 proposals of De Iorio and Griffiths (2004b). We present an inductive method for determining  
56 the marginal novel-allele probability for samples of arbitrary size, noting that the IS proposal  
57 for the novel-allele probability of De Iorio and Griffiths and colleagues approximates this  
58 marginal probability.

## 59 **2 Labelled histories**

### 60 **2.1 Genealogical histories conditional on observed variants**

61 Observation of the pattern of variation in a sample constrains the domain of possible states  
62 of lineages ancestral to the sampled genes. For example, the assumption of low rates of  
63 coalescence and mutation excludes the possibility of immediate coalescence between non-  
64 identical genes. Beyond such forbidden transitions, the possible ancestral states do not  
65 necessarily occur with uniform probabilities.

66 Wiuf and Donnelly (1999) addressed the genealogical histories implied by the observation  
67 of a single mutation. In the absence of homoplasy, all lineages bearing the mutation must  
68 coalesce with one another more recently than any coalesce with other lineages. Accordingly,  
69 the observed pattern of variation implies a topology that includes a branch from which all  
70 mutation-bearing lineages and no other lineages descend. The Wiuf and Donnelly (1999)

71 method generates topologies by proposing an ancestor state with probability corresponding  
72 to the probability that the state has a genealogical history consistent with the pattern of  
73 mutation. Because the proposal distribution is in fact the desired probability, it is the  
74 optimal proposal distribution. They obtained an exact expression for the probability of the  
75 set of topologies on which the observed pattern of variation has positive probability. Wiuf  
76 and Donnelly (1999) used their method to address the age of a unique mutation segregating  
77 in a sample of genes derived from a panmictic population.

78 Lemman *et al.* (2005) incorporated the Wiuf and Donnelly (1999) approach in developing an  
79 IS analysis of genetic variation in a noncoding region assumed to show absolute linkage to the  
80 paracentric inversion that contributes to reproductive isolation between a pair of *Drosophila*  
81 species. This study generated maximum likelihood estimates of the time since speciation  
82 and the effective population sizes of the extant species and their ancestor species. The  
83 observed pattern of genetic variation in the structured sample corresponded to the number  
84 of segregating mutations of 7 types, reflecting whether a mutation is absent ( $a$ ) from the  
85 subsample derived from a given species, segregating ( $s$ , present in some but not all lineages in  
86 the subsample), or fixed ( $f$ , present in all lineages in the subsample). Observation of multiple  
87 mutations present in the subsample from each species but absent from the subsample from  
88 the other species implies an MRCA of each subsample more recent than any cross-species  
89 coalescence event (see Fig. 1). Building on the principles introduced by Wiuf and Donnelly  
90 (1999), Lemman *et al.* (2005, Appendix B) developed a recursion in the probability of a  
91 topology consistent with both the mutational array and the process of speciation, including  
92 the forward progression from a single ancestor species to complete reproductive isolation at  
93 the observed locus. Each IS proposal of the complete genealogical history entails generation  
94 of a topology of the full sample and then placement of mutations on the tree. As the  
95 proportion of random trees on which the observed data have positive probability is on the  
96 order of  $7.7 \times 10^{-9}$ , incorporation of the modified Wiuf and Donnelly (1999) approach greatly  
97 improves the efficiency of the IS analysis by ensuring that all proposed trees are consistent

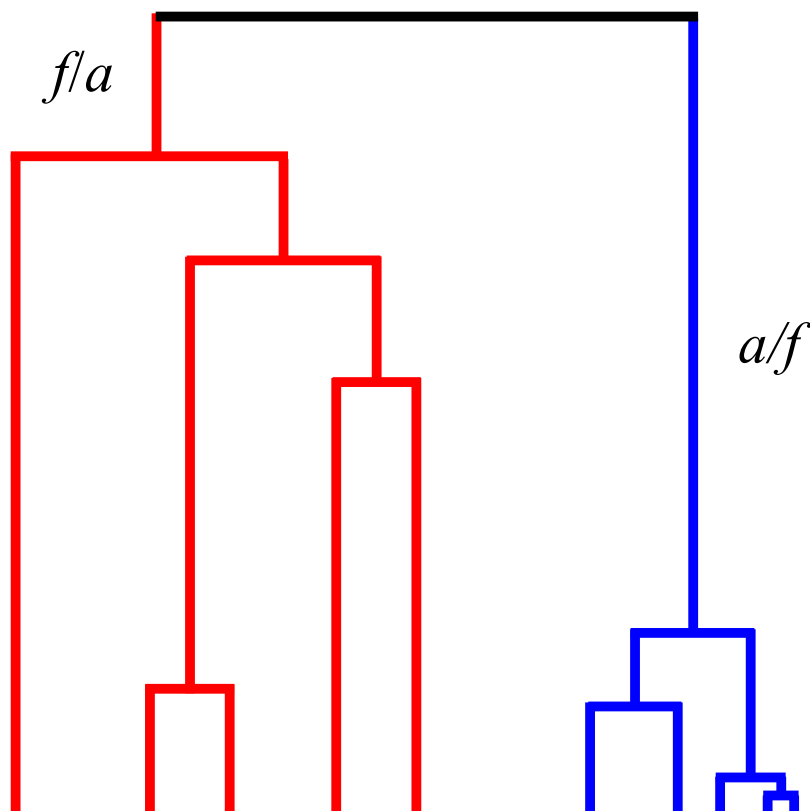

Figure 1: Topology consistent with observation of fixed mutational differences between subsamples derived from each of two species (red and blue). Mutations arising on the branch labelled  $f/a$  are fixed ( $f$ ) in the subsample derived from the red species and absent ( $a$ ) from the subsample derived from the blue species. Similarly, mutations arising on the branch labelled  $a/f$  occur only in the subsample derived from the blue species.

98 with the observed data.

## 99 2.2 Karlin-McGregor recursion

100 **Next-sampled gene:** Ewens's (1972) own derivation of the ESF (1) proceeded from the  
101 "remarkable intuitive insight" (Karlin and McGregor 1972) that the probability that the last  
102 ( $n^{\text{th}}$ ) gene added to a sample of size  $n - 1$  represents a novel allele corresponds to

$$\pi_{n-1} = \frac{\theta}{\theta + n - 1}, \quad (3a)$$

103 with the probability that the last gene belongs to an allelic class already represented in the  
 104 sample in multiplicity  $i$  ( $i = 1, 2, \dots, n - 1$ ) given by

$$(1 - \pi_{n-1}) \frac{ia_i}{n-1} = \frac{ia_i}{\theta + n - 1}, \quad (3b)$$

105 for  $a_i$  denoting the number of alleles present in the sample in multiplicity  $i$  (1).

106 **Labelled coalescent argument:** To establish the ESF without prior knowledge of the  
 107 distribution of the allelic type of the next-sampled gene (3), Karlin and McGregor (1972)  
 108 used a labelled coalescent argument to produce a recursion in the AFS probabilities and  
 109 showed that the ESF (1) satisfies it.

As in Uyenoyama *et al.* (2019), we denote the present (descendant) sample by  $D = \mathbf{a}$ , for  $\mathbf{a}$  the allele frequency spectrum (AFS). In the case of structured populations, for example,  $\mathbf{a}$  provides information on the multiplicities and locations of the alleles in the sample. Let  $T$  represent the single evolutionary event that separates descendant  $D = \mathbf{a}$  from its immediate ancestor  $A = \mathbf{b}$ . For example, in the model (6) we will address here, the evolutionary event may correspond to migration, mutation, or coalescence. In general, the event may reflect any evolutionary process, including recombination. The likelihood of the model together with its parameters ( $\Phi$ ) corresponds to the solution of a recursion over the most recent evolutionary event:

$$\begin{aligned} \Pr(D = \mathbf{a} | \Phi) &= \sum_t \Pr(D = \mathbf{a}, T = t | \Phi) = \sum_t \Pr(D = \mathbf{a} | T = t, \Phi) \Pr(T = t | \Phi) \\ &= \sum_t \Pr(T = t | \Phi) \sum_{\mathbf{b}} \Pr(D = \mathbf{a}, A = \mathbf{b} | T = t, \Phi) \\ &= \sum_t \Pr(T = t | \Phi) \sum_{\mathbf{b}} \Pr(D = \mathbf{a} | A = \mathbf{b}, T = t, \Phi) \Pr(A = \mathbf{b} | T = t, \Phi). \end{aligned}$$

Using that the ancestor state is independent of the next evolutionary event forward in time,

$$\Pr(A = \mathbf{b} | T = t, \Phi) = \Pr(A = \mathbf{b} | \Phi),$$



110 we obtain

$$\Pr(D = \mathbf{a}|\Phi) = \sum_t \Pr(T = t|\Phi) \sum_{\mathbf{b}} \Pr(D = \mathbf{a}|T = t, A = \mathbf{b}, \Phi) \Pr(A = \mathbf{b}|\Phi). \quad (4)$$

111 Similar to what has now become a standard coalescence approach, this recursion may be  
112 read as conditioning first on the evolutionary event ( $T$ ). The information contained in the  
113 observation of the labelling (allelic class) of the sampled genes affects  $\Pr(D = \mathbf{a}|T = t, A =$   
114  $\mathbf{b}, \Phi)$ , which links the ancestor to the descendant. In many assignments of the ancestor AFS  
115 ( $\mathbf{b}$ ), this term is likely to be zero. Appendix A presents the recursion under the infinite-alleles  
116 model in unstructured populations.

117 Recursion (4) applies in quite general contexts. Restricted to the infinite-alleles model  
118 of mutation, it can be solved inductively, by progressively incrementing sample size, number  
119 of distinct allelic classes, and number of singleton alleles, to produce AFS probabilities for  
120 samples derived from structured populations (Uyenoyama *et al.* 2019).

121 **Conditional probabilities:** Karlin and McGregor (1972) observed that ratios of AFS  
122 probabilities may be interpreted as conditional probabilities: for example, the probability of  
123 an AFS formed upon sampling an additional gene, given the present AFS. In the case of the  
124 ESF, (3a) corresponds to

$$\frac{p_n(\mathbf{a})}{p_{n-1}(\mathbf{a} - \mathbf{e}_1)} \left( \frac{a_1}{n} \right), \quad (5)$$

125 in which the first factor represents the conditional probability of a full sample (size  $n$ ) with  
126 AFS  $\mathbf{a}$  given that the penultimate sample (size  $n - 1$ ) has AFS  $\mathbf{a} - \mathbf{e}_1$ , and the second the  
127 probability that the last ( $n^{\text{th}}$ ) gene sampled corresponds to one of the  $a_1$  singleton alleles.  
128 This interpretation of ratios of AFS probabilities as conditional probabilities is key to the  
129 insightful IS proposals developed by De Iorio and Griffiths (2004b) for generalized models of  
130 mutation in structured populations. Further, we show in the Appendix B that it provides  
131 another means of obtaining the novel-allele probability (3a) directly, even without derivation  
132 of the full ESF (1).

## 133 **2.3 Distribution of the ancestor given the descendant in unstruc-** 134 **tured populations**

135 A number of works have explored methods for approximating the distribution of the immedi-  
136 ate ancestor of an observed sample in more general contexts (*e.g.*, Hoppe 1987; Griffiths and  
137 Tavaré 1994a,b; Stephens and Donnelly 2000; Tavaré 2004; De Iorio and Griffiths 2004b). By  
138 addressing the distribution of the next-sampled gene, Stephens and Donnelly (2000) devel-  
139 oped a more efficient class of importance sampling (IS) proposal distributions for generating  
140 genealogical histories. Hobolth *et al.* (2008) presented a comparison of the IS proposal  
141 distributions of Griffiths and Tavaré (1994a) and Stephens and Donnelly (2000) under the  
142 infinite-sites model.

143 Stephens and Donnelly (2000) noted that determination of the exact distribution of  
144 the immediate ancestor of the lineages in a sample conditional on the descendant sample  
145 is tantamount to full knowledge of AFS probabilities. As an illustration, we use the full  
146 solution provided by the ESF (1) to describe this distribution under the infinite-alleles model  
147 of mutation in an unstructured population (Appendix C).

## 148 **3 Structured populations**

### 149 **3.1 Key properties of the ESF**

We address the extent to which the sampling properties of the ESF are preserved under infinite-alleles mutation in subdivided populations, in which evolutionary events include migration as well as mutation and coalescence. In the two-deme setting explored by Uyenoyama *et al.* (2019), deme  $i$  ( $i = 0, 1$ ) comprises an effective number of  $2N_i$  genes with backward migration rate  $m_i$  and novel alleles arise at the per-gene, per-generation mutation rate of  $u$ , implying 4 parameters:

$$\Phi = \{\theta, M_0, M_1, c_0, c_1\},$$

150 in which

$$\begin{aligned}\theta &= \lim_{\substack{u \rightarrow 0 \\ N \rightarrow \infty}} 4Nu \\ M_i &= \lim_{\substack{m_i \rightarrow 0 \\ N \rightarrow \infty}} 4Nm_i \\ c_i &= \lim_{N, N_i \rightarrow \infty} \frac{N}{N_i},\end{aligned}\tag{6}$$

151 for  $N$  an arbitrary constant that goes to infinity at a rate comparable to the  $N_i$  (compare  
152 (1)). AFS  $\mathbf{a}$  now comprises elements of the form  $a_{ij}$ , corresponding to the number allelic  
153 classes that have  $i$  replicates in the subsample derived from deme 0 and  $j$  replicates in the  
154 subsample derived from deme 1. Similarly,  $\mathbf{e}_{ij}$  denotes a unit vector, with unity in the  $ij^{\text{th}}$   
155 position and zeros elsewhere. For clarity, we use  $p_{n_0, n_1}(\mathbf{a})$  to denote the probability of AFS  
156  $\mathbf{a}$ , with the subscript explicitly indicating the number of genes ( $n_0$  and  $n_1$ ) derived from the  
157 two demes.

158 Determining the distribution of the ancestor AFS in general contexts would be facilitated  
159 if some key properties of the ESF were universally preserved. As Appendix C illustrates,  
160 such properties in the case of structured populations might include that

- 161 (1) the probability that the next-sampled gene represents a novel allele depends on the  
162 parameters of the model and the sampling configuration (demic origin of the genes)  
163 but not on the particular AFS observed in the penultimate sample (prior to the addition  
164 of the last gene) and
- 165 (2) for a given most recent evolutionary event (migration, mutation, or coalescence) in a  
166 specified deme, all genes in the ultimate sample (after the addition of the last gene)  
167 residing in that deme have a uniform probability of having participated in that evolu-  
168 tionary event.

169 These properties of the ESF do not in fact extend to structured populations (Uyenoyama  
170 *et al.* 2019). In particular, the probability of sampling a novel allele depends on AFS of the

171 present sample. Even so, the IS proposals based on these properties appear to be the most  
 172 efficient available for generalized mutation and population structures (De Iorio and Griffiths  
 173 2004b; De Iorio *et al.* 2005). In particular, the IS proposals of De Iorio and Griffiths (2004b)  
 174 for the probabilities of sampling a gene that represents a novel allele or an already-observed  
 175 allelic class represent solutions of linear systems of equations that those quantities must  
 176 satisfy if properties possessed under the ESF framework were preserved under the generalized  
 177 framework.

### 178 3.2 De Iorio-Griffiths IS proposals

179 Given observation of AFS  $\mathbf{a}$  in a sample comprising  $n_i$  genes derived from deme  $i$  ( $i = 0, 1$ ),  
 180 the probability that a gene sampled from deme 0 represents a novel allele corresponds to

$$\pi_{n_0, n_1}(\mathbf{a}, 0) = \frac{p_{n_0+1, n_1}(\mathbf{a} + \mathbf{e}_{10})(a_{10} + 1)/(n_0 + 1)}{p_{n_0, n_1}(\mathbf{a})}. \quad (7a)$$

181 This expression reflects the characterization (5) of Karlin and McGregor (1972) of the last-  
 182 sampled gene in terms of a conditional probability, with the factor  $(a_{10} + 1)/(n_0 + 1)$  denoting  
 183 the probability that the last-sampled gene is a singleton allele. Similarly, the probability that  
 184 the last-sampled gene represents an allele already present in the sample in multiplicity  $x_0$  in  
 185 deme 0 and  $x_1$  in deme 1 corresponds to

$$\frac{p_{n_0+1, n_1}(\mathbf{a} - \mathbf{e}_{x_0 x_1} + \mathbf{e}_{(x_0+1)x_1})(x_0 + 1)(a_{(x_0+1)x_1} + 1)/(n_0 + 1)}{p_{n_0, n_1}(\mathbf{a})}. \quad (7b)$$

186 Analogous expressions arise in the case in which the next-sampled gene derives from deme  
 187 1.

188 The IS proposals of De Iorio and Griffiths (2004b) incorporate an approximation to  
 189  $\pi_{n_0, n_1}(\mathbf{a}, 0)$  (7a), which reduces in the case at hand (6) to

$$\hat{\Omega}(0, n_0, n_1) = \frac{\theta(n_1 c_1 + \theta + M_0 + M_1)}{(n_0 c_0 + \theta)(n_1 c_1 + \theta) + M_0(n_1 c_1 + \theta) + M_1(n_0 c_0 + \theta)} \quad (8a)$$

190 ( $\hat{\pi}(j|\alpha, \mathbf{n})$  in their notation). Their approximation for the probability (7b) that the last-  
 191 sampled gene belongs to a particular allelic class for which the sample already contains  $x_0$   
 192 replicates in deme 0 and  $x_1$  replicates in deme 1 is

$$\hat{\Pi}(x_0, x_1|0, n_0, n_1) = \frac{x_0 c_0 (n_1 c_1 + \theta + M_1) + x_1 c_1 M_0}{(n_0 c_0 + \theta)(n_1 c_1 + \theta) + M_0(n_1 c_1 + \theta) + M_1(n_0 c_0 + \theta)}, \quad (8b)$$

193 for  $x_0 > 0$  or  $x_1 > 0$ .

Similar expressions hold for cases in which the last gene is derived from deme 1:

$$\hat{\Omega}(1, n_0, n_1) = \frac{\theta(n_0 c_0 + \theta + M_0 + M_1)}{(n_0 c_0 + \theta)(n_1 c_1 + \theta) + M_0(n_1 c_1 + \theta) + M_1(n_0 c_0 + \theta)} \quad (9a)$$

$$\hat{\Pi}(x_0, x_1|1, n_0, n_1) = \frac{x_1 c_1 (n_0 c_0 + \theta + M_0) + x_0 c_0 M_1}{(n_0 c_0 + \theta)(n_1 c_1 + \theta) + M_0(n_1 c_1 + \theta) + M_1(n_0 c_0 + \theta)}, \quad (9b)$$

194 for  $x_0 > 0$  or  $x_1 > 0$ .

### 195 3.3 Marginal probability of a novel allele

196 For our two-deme model (6), we present an inductive method to determine the probability  
 197 that a gene sampled from a specified deme and added to a sample comprising  $n_i$  genes from  
 198 deme  $i$  ( $i = 0, 1$ ) represents a novel allele, marginalized over all possible allele frequency  
 199 spectra observed in the initial sample. As we can in principle obtain all AFS probabilities,  
 200 this marginal probability might be obtained from expressions such as (7a), corresponding to  
 201 sampling of the next gene from deme 0:

$$\sum_{\mathbf{a}} p_{n_0, n_1}(\mathbf{a}) \frac{p_{n_0+1, n_1}(\mathbf{a} + \mathbf{e}_{10})(a_{10} + 1)/(n_0 + 1)}{p_{n_0, n_1}(\mathbf{a})} = \sum_{\mathbf{a}} p_{n_0+1, n_1}(\mathbf{a} + \mathbf{e}_{10}) \frac{a_{10} + 1}{n_0 + 1}. \quad (10)$$

202 On the left is the conditional probability, expressed as a ratio as in (5), that a gene de-  
 203 rived from deme 0 represents a novel allele multiplied by the probability of the penultimate  
 204 sample (prior to the addition of that gene). Our method, implemented in the supplemental  
 205 Mathematica notebook accompanying this article, permits determination of the marginal

206 probability of a novel allele directly, without prior knowledge of all AFS probabilities.

207 Under the infinite-alleles model, we need follow a lineage up to only the most recent  
 208 mutation or coalescence event (compare Griffiths and Lessard 2005). Regardless of the  
 209 number of older mutations a lineage may have accumulated, a mutation represents the origin  
 210 of an allelic class in the population. Level  $\ell$  of the full  $n$ -gene genealogy corresponds to the  
 211 segment that comprises  $\ell$  lineages. That the last-sampled gene represents a novel allele  
 212 entails either that the focal lineage terminates in a mutation on level  $\ell$  ( $\ell = 3, \dots, n$ ) of the  
 213 gene genealogy or that the focal lineage persists to level 2 and a mutation occurs in either  
 214 of the remaining lineages on that level.

215 On level  $\ell$ , state  $i$  ( $0 \leq i \leq \ell - 1$ ) corresponds to the residence of the focal lineage in  
 216 deme 0 together with  $i$  non-focal lineages; similarly, state  $i$  ( $\ell \leq i \leq 2\ell - 1$ ) corresponds  
 217 to the residence of the focal lineage in deme 1 together with  $i - \ell$  non-focal lineages. From  
 218 state  $i$  on level  $\ell$ , the total rate of change corresponds to

$$d_{\ell,i} = \begin{cases} \ell u + m_0(i + 1) + m_1(\ell - i - 1) + \frac{\binom{i+1}{2}}{2N_0} + \frac{\binom{\ell-i-1}{2}}{2N_1} & \text{for } i \in [0, \ell - 1] \\ \ell u + m_0(2\ell - i - 1) + m_1(i - \ell + 1) + \frac{\binom{2\ell-i-1}{2}}{2N_0} + \frac{\binom{i-\ell+1}{2}}{2N_1} & \text{for } i \in [\ell, 2\ell - 1]. \end{cases} \quad (11)$$

219 Because a coalescence event involving the focal lineage implies that the focal lineage  
 220 shares its allelic state with at least one non-focal lineage, we exclude such an event in  
 221 determining the probability that the focal gene represents a novel allele. Accordingly, the  
 222 most recent event backward in time may correspond to a transition to a transient state on  
 223 level  $\ell$ , reflecting migration, or to termination of the level, either through coalescence between  
 224 a pair of non-focal lineages or through mutation in the focal lineage or in a non-focal lineage.  
 225 Termination of the focal lineage by mutation implies that it represents a novel allele.

226 To determine the probability that the process terminates on level  $\ell$ , with a mutation in  
 227 the focal lineage, or that it continues on to level  $\ell - 1$ , we describe instantaneous rates of  
 228 within-level and between-level transitions. Matrix  $\hat{U}_\ell$ , a square matrix with  $2\ell$  rows and  
 229 columns, provides the probabilities of transitions through migration, with the  $ij^{\text{th}}$  element

230 denoting the probability that the most recent event back in time corresponds to a transition  
 231 from state  $i$  to state  $j$ . For the residence of the focal gene in deme 0 ( $i \in [0, \ell - 1]$ ),

$$\hat{U}_\ell(ij) = \begin{cases} m_0 i / d_{\ell,i} & \text{for } j = i - 1, i > 0 \\ m_1 (\ell - i - 1) / d_{\ell,i} & \text{for } j = i + 1, i < \ell - 1 \\ m_0 / d_{\ell,i} & \text{for } j = 2\ell - 1 - i, \end{cases} \quad (12a)$$

232 with all other elements set to zero. These transitions respectively denote backward migration  
 233 of a non-focal lineage presently in deme 0, of a non-focal lineage presently in deme 1, and  
 234 of the focal lineage itself, with  $\hat{U}_\ell(ij) = 0$  for other values of  $i$  and  $j$ . Similarly, for the  
 235 residence of the focal gene in deme 1 ( $i \in [\ell, 2\ell - 1]$ ), elements of  $\hat{U}_\ell$  correspond to

$$\hat{U}_\ell(ij) = \begin{cases} m_0 (2\ell - i - 1) / d_{\ell,i} & \text{for } j = i + 1, i < 2\ell - 1 \\ m_1 (i - \ell) / d_{\ell,i} & \text{for } j = i - 1, i > \ell \\ m_1 / d_{\ell,i} & \text{for } j = 2\ell - i - 1, \end{cases} \quad (12b)$$

236 again respectively denoting backward migration of a non-focal lineage presently in deme 0,  
 237 of a non-focal lineage presently in deme 1, and of the focal lineage itself.

238 Matrix  $\hat{V}_\ell^*$  ( $2\ell \times 2(\ell - 1)$ , for  $2(\ell - 1)$  the number of states on level  $\ell - 1$ ), provides the  
 239 probabilities of between-level transitions that do not involve the focal lineage: a mutation in  
 240 a non-focal lineage or coalescence between a pair of non-focal lineages. State  $i$  ( $i \in [0, \ell - 1]$ )  
 241 denotes the residence of the focal gene in deme 0 together with  $i$  non-focal lineages, with the  
 242 remaining  $(\ell - 1 - i)$  lineages (all non-focal) residing in deme 1. Elements of  $\hat{V}_\ell$  include

$$\hat{V}_\ell^*(ij) = \begin{cases} \left( iu + \frac{\binom{i}{2}}{2N_0} \right) / d_{\ell,i} & \text{for } j = i - 1, i > 0 \\ \left( (\ell - 1 - i)u + \frac{\binom{\ell-1-i}{2}}{2N_1} \right) / d_{\ell,i} & \text{for } j = i, \ell - 1 > i \end{cases} \quad (13a)$$

243 with other entries and unmeaningful expressions (*e.g.*,  $\binom{c}{d}$  with  $c < d$ ) set to zero. Similarly,  
 244 for the focal gene residing in deme 1 ( $i \in [\ell, 2\ell - 1]$ ) together with  $(i - \ell)$  non-focal lineages  
 245 and the remaining  $(2\ell - 1 - i)$  non-focal lineages in deme 0,

$$\hat{\mathbf{V}}_{\ell}^*(ij) = \begin{cases} \left( (2\ell - i - 1)u + \frac{\binom{2\ell-i-1}{2}}{2N_0} \right) / d_{\ell,i} & \text{for } j = i - 1, 2\ell - 1 > i \\ \left( (i - \ell)u + \frac{\binom{i-\ell}{2}}{2N_1} \right) / d_{\ell,i} & \text{for } j = i - 2, i > \ell. \end{cases} \quad (13b)$$

246 Vector  $\mathbf{T}_{\ell}$  ( $2\ell \times 1$ ) provides rates of termination with the focal gene representing a novel  
 247 allele:

$$\mathbf{T}_{\ell}(i) = \begin{cases} u/d_{\ell,i} & \ell > 2 \\ 2u/d_{2,i} & \ell = 2. \end{cases} \quad (14)$$

248 Here, the expression for level  $\ell > 2$  reflects a mutation in the focal lineage and the expression  
 249 for level  $\ell = 2$  reflects a mutation either in the focal lineage or in the single remaining non-  
 250 focal lineage.

We now replace the elements of  $\hat{\mathbf{U}}_{\ell}$ ,  $\hat{\mathbf{V}}_{\ell}$ , and  $\mathbf{T}_{\ell}$  by their limiting values as described in  
 (6): for  $\ell > 2$  for example,

$$\begin{aligned} \mathbf{T}_{\ell}(i) &= \lim \frac{u}{\ell u + m_0(i + 1) + m_1(\ell - i - 1) + \frac{\binom{i+1}{2}}{2N_0} + \frac{\binom{\ell-i-1}{2}}{2N_1}}{\theta} \\ &= \frac{u}{\ell\theta + M_0(i + 1) + M_1(\ell - i - 1) + (i + 1)ic_0 + (\ell - i - 1)(\ell - i - 2)c_1}. \end{aligned}$$

We describe as transient the states among which transitions reflecting migration occur as  
 indicated by  $\hat{\mathbf{U}}_{\ell}$ . The columns of  $\hat{\mathbf{V}}_{\ell}$  and elements of  $\hat{\mathbf{T}}_{\ell}$  correspond to exit states, indicating  
 termination of level  $\ell$ . As shown in Appendix A of Uyenoyama *et al.* (2019), the probability  
 that a process presently in transient state  $i$  exits through state  $j$ , representing an event not  
 involving the focal lineage, corresponds to the  $ij^{th}$  element of

$$[\mathbf{I} - \hat{\mathbf{U}}_{\ell}]^{-1} \hat{\mathbf{V}}_{\ell}.$$



251 The probability of an exit through mutation in the focal gene is similar but with  $\hat{V}_\ell$  replaced  
 252 by  $\mathbf{T}_\ell$ .

253 We use  $\mathbf{W}_n$  to denote the vector of probabilities that the focal gene, added to a sample  
 254 of size  $n - 1$  is novel. For  $i \in [0, n - 1]$ , the  $i^{\text{th}}$  element,  $\mathbf{W}_n(i)$ , provides the probability  
 255 that a gene, obtained from deme 0 to form an  $n$ -gene sample comprising  $n_0 = i + 1$  genes  
 256 from deme 0 and the remainder from deme 1, represents a novel allele. Similarly,  $\mathbf{W}_n(i)$   
 257 for  $i \in [n, 2n - 1]$  provides the probability that a gene, obtained from deme 1 to form an  
 258  $n$ -gene sample comprising  $n_1 = i - n + 1$  genes from deme 1 and the remainder from deme  
 259 0, represents a novel allele.

We determine  $\mathbf{W}_n$  for a sample of arbitrary size by induction, beginning with  $n = 2$ , for  
 which

$$\mathbf{W}_2 = [\mathbf{I} - \hat{\mathbf{U}}_2]^{-1} \mathbf{T}_2.$$

260 For example, under symmetry between the demes in migration rates and effective numbers,

$$M_0 = M_1 = M \quad c_0 = c_1 = 1, \quad (15)$$

the vector of probabilities reduces to

$$\mathbf{W}_2 = \begin{pmatrix} \frac{\theta(1+2M+\theta)}{M+\theta(1+2M)+\theta^2} \\ \frac{\theta(2M+\theta)}{M+\theta(1+2M)+\theta^2} \\ \frac{\theta(1+2M+\theta)}{M+\theta(1+2M)+\theta^2} \\ \frac{\theta(2M+\theta)}{M+\theta(1+2M)+\theta^2} \end{pmatrix},$$

confirming the results of Hudson (1990). For arbitrarily large migration rates ( $M \rightarrow \infty$ ),  
 every element of  $\mathbf{W}_2$  in this case reduces to

$$\frac{2\theta}{1+2\theta}.$$

261 This expression agrees with the expression under the ESF (3a), noting that the total effective  
 262 number of the combined demes is  $2N$ , which implies that  $\theta$  in (3a) corresponds in this case  
 263 ( $M \rightarrow \infty$ ) to our  $2\theta$ .

In general ( $\ell > 2$ ), a process in state  $i$  on level  $\ell$  may terminate immediately, with a mutation in the focal lineage, with probability given by the  $i^{\text{th}}$  element of

$$\mathbf{W}_\ell = [\mathbf{I} - \hat{\mathbf{U}}_\ell]^{-1} \mathbf{T}_\ell.$$

Otherwise, the process proceeds to level  $\ell - 1$ , with the probability that the focal gene represents a novel allele given by

$$[\mathbf{I} - \hat{\mathbf{U}}_\ell]^{-1} \hat{\mathbf{V}}_\ell^* \mathbf{W}_{\ell-1}.$$

264 Accordingly,  $\mathbf{W}_n$  may be determined inductively, from

$$\mathbf{W}_\ell = \begin{cases} [\mathbf{I} - \hat{\mathbf{U}}_2]^{-1} \mathbf{T}_2 & \ell = 2 \\ [\mathbf{I} - \hat{\mathbf{U}}_\ell]^{-1} [\hat{\mathbf{V}}_\ell^* \mathbf{W}_{\ell-1} + \mathbf{T}_\ell] & \ell > 2. \end{cases} \quad (16a)$$

265 For arbitrary sample size  $n$  and  $z$  the level on which the mutation that establishes the focal  
 266 gene as a new allele occurs,

$$\mathbf{W}_n = \sum_{z=2}^n \left( \prod_{\ell=z+1}^n [\mathbf{I} - \hat{\mathbf{U}}_\ell]^{-1} \hat{\mathbf{V}}_\ell^* \right) [\mathbf{I} - \hat{\mathbf{U}}_z]^{-1} \mathbf{T}_z, \quad (16b)$$

267 in which the matrix product begins on the left with  $[\mathbf{I} - \hat{\mathbf{U}}_n]^{-1} \hat{\mathbf{V}}_n^*$  and ends on the right  
 268 with  $[\mathbf{I} - \hat{\mathbf{U}}_{z+1}]^{-1} \hat{\mathbf{V}}_{z+1}^*$ .

269 In panmictic populations, the probability that the lineage of the last-sampled gene ter-  
 270 minates in a mutation on a given genealogical level is uniform across levels (Appendix A of  
 271 Redelings *et al.* 2015). This property is not preserved under population subdivision.

## 272 4 Assessment of IS proposals

273 We assess characteristics of the IS proposals given in Section 3.2 in a two-deme setting (6).

### 274 4.1 Next-observed gene

275 We address the probability that the next gene sampled from a specified deme represents a  
276 novel allele. We compare the IS proposal (8a) of De Iorio and Griffiths (2004b) to the exact  
277 marginal novel-allele probability (16).

A total of 2193 AFSs are possible for a sample size  $n = 10$ , including all possible sample configurations (assignments of  $n_0$  and  $n_1$  for  $n_0 + n_1 = 10$ ). For 10-gene samples derived wholly from a single deme ( $n_0 = 10$  or  $n_1 = 10$ ), the number of AFSs corresponds to 42, the number under the ESF (1) and the answer to the ultimate question of life, the universe, and everything. Figure 2 presents the 42 AFSs for a penultimate sample of size  $n = 10$ , all derived from deme 1, ranked by the probability that an additional (11<sup>th</sup>) gene, sampled from deme 0, represents a novel allele. The blue horizontal line corresponds to the marginal novel-allele probability across AFSs, with AFS weighted by its probability, obtained recursively using (16). The horizontal black line, corresponding to the novel-allele probability expected under the ESF

$$\pi_{10} = \frac{\theta}{\theta + 10}$$

278 (see (3a)), greatly underestimates the true novel-allele probability for every AFS. The green  
279 line, corresponding to the ESF expression with  $\theta$  replaced by an effective  $\theta$ , designed to  
280 account in part for population structure (Eq. (26) of Uyenoyama *et al.* 2019), provides only  
281 a modest improvement. The IS proposal (8a) of De Iorio and Griffiths (2004b) (red), which  
282 takes into account the numbers of lineages in each deme, greatly increases the novel-allele  
283 probability, bringing the proposal much closer to the marginal. However, it overestimates  
284 the novel-allele probability for all AFSs with the exception of the maximal (leftmost) value,  
285 which corresponds to a monomorphic sample.

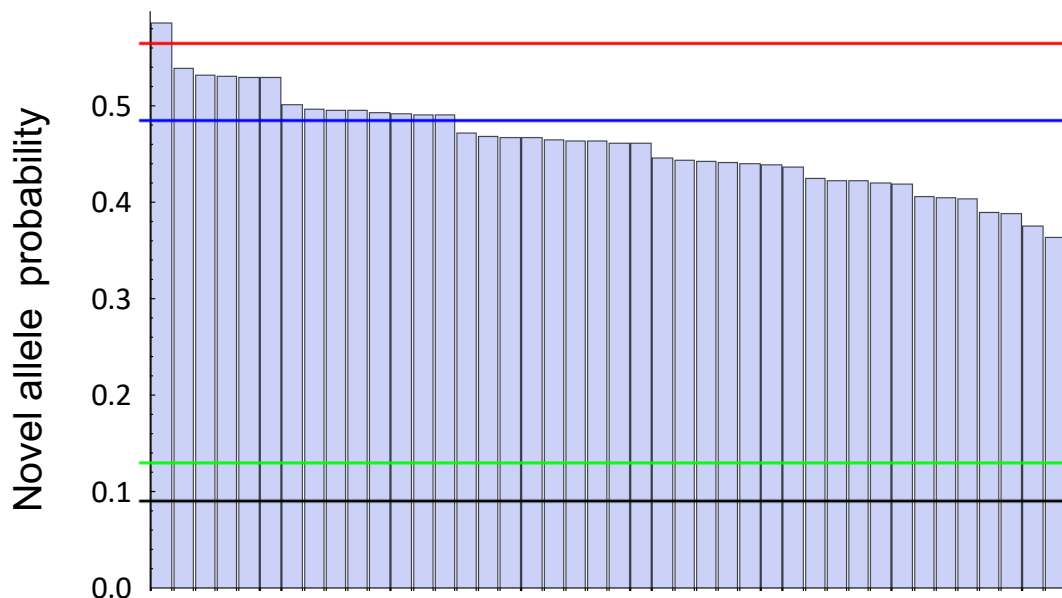

Figure 2: Ranked novel-allele probabilities across AFSs under  $\theta = M_0 = M_1 = c_0 = c_1 = 1.0$ ,  $n_0 = 0$ ,  $n_1 = 10$ . Horizontal lines correspond to the marginal novel-allele probability across AFSs (blue (16)), the ESF probability for panmictic populations (black (3a)), the ESF probability with a proposed effective  $\theta$  (green), and the De Iorio and Griffiths (2004b) IS proposal (red (8a)).

286 Figure 3 presents histograms of novel-allele probabilities for an initial sample of size  
287  $n_0 + n_1 = 10$ , with the width of the bars proportional to the AFS probabilities prior to  
288 the addition of the last ( $11^{th}$ ) gene across initial sample configurations ( $n_0 = 0, 1, \dots, 10$ ).  
289 For a given histogram, the marginal novel-allele probability (16) corresponds to the mean  
290 of the histogram. Among the major factors influencing the the probability that the last-  
291 sampled gene represents a new allele is the extent of isolation of last gene in the sampling  
292 configuration: whether the last gene derives from a deme different from the majority of  
293 the sample. Figure 3 indicates that the mode and most of the mass of the distribution of  
294 the novel-allele probability tend to increase with greater isolation of the last-sampled gene  
295 (smaller values of  $n_0$ ). This trend is consistent with the observation of Uyenoyama *et al.*  
296 (2019, see their Fig. 3) that singleton mutations are more likely to occur on the long branches  
297 connecting isolated lineages to the gene genealogy of the rest of the sample. Figure 3 suggests

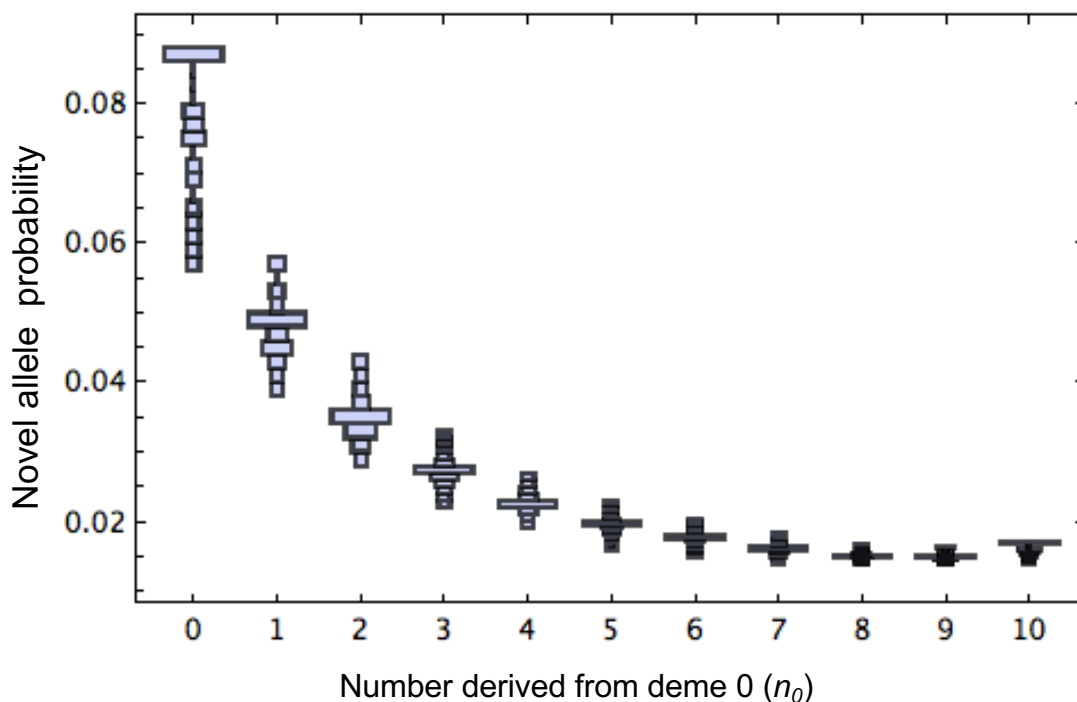

Figure 3: Novel-allele probabilities across AFSs under  $\theta = 0.1$ ,  $M_0 = M_1 = c_0 = c_1 = 1.0$ ,  $n_0 + n_1 = 10$  across initial sample configurations ( $n_0 = 0, 1, \dots, 10$ ). All histograms have 10 bins, with bar width proportional to the sum of the probabilities of the AFSs that contribute to each bin.

298 that this effect persists even for mild levels of isolation: sampling configurations in which  
 299 the last-sampled gene derives from the deme of a minority of the sample, for example. This  
 300 trend is apparent even for relatively high rates of gene flow (*e.g.*,  $M_0 = M_1 = 1$  in Fig. 3)  
 301 and intensifies as gene flow declines. Higher values of the scaled mutation parameter tend to  
 302 increase the novel-allele probability, although the effect depends on the relative magnitudes  
 303 of the rates of mutation ( $\theta$ ), migration ( $M_i$ ), and coalescence ( $c_i$ ).

304 Under the parameter assignments corresponding to Figure 2, Figure 4 presents the relative  
 305 error of the IS proposal for the novel-allele probability of De Iorio and Griffiths (2004b),  
 306 expressed as a relative proportion:

$$\rho = \frac{X - Y}{Y}, \quad (17)$$

307 for  $X$  corresponding to (8a) and  $Y$  to the actual marginal novel-allele probability (16). For

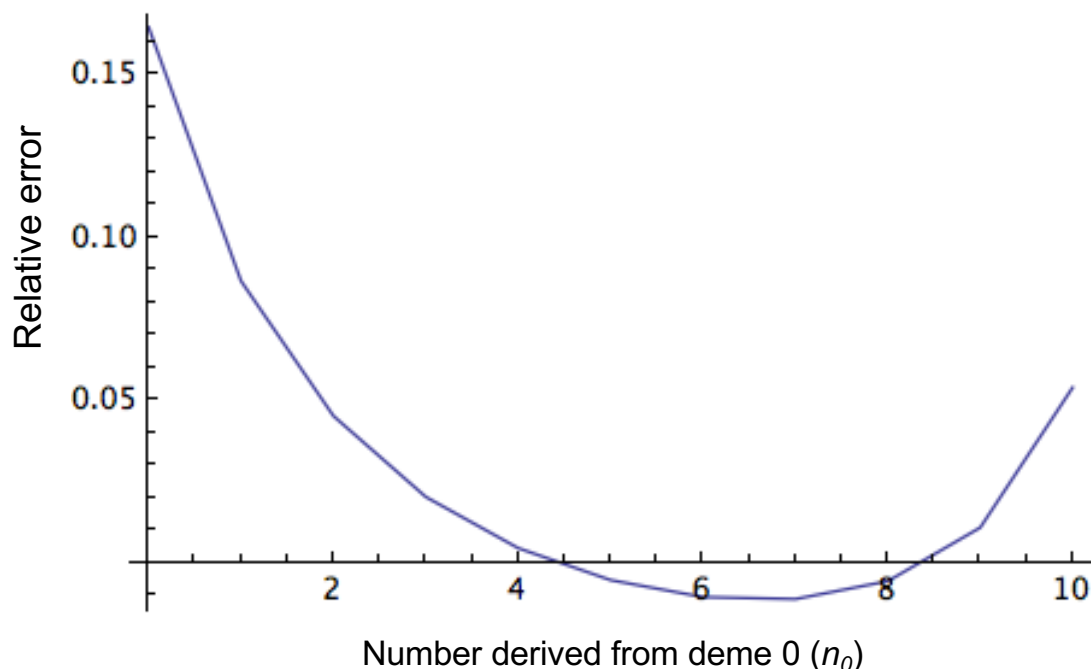

Figure 4: Relative error  $\rho$  (17) between the marginal probability that a gene sampled from deme 0 represents a novel allele (16) and IS proposal (8a), across initial sampling configurations in which  $n_0$  genes derive from deme 0 ( $n_0 = 0, 1, \dots, 10$ ), with  $\theta = M_0 = M_1 = c_0 = c_1 = 1.0$ .

308 this symmetric migration case ( $M_0 = M_1$ ), the IS proposal (8a) shows a general correspon-  
309 dence with the marginal probability of a novel allele (16), with a maximum error of about  
310 17% for the case in which the entire penultimate sample derives from a deme distinct from  
311 that of last gene ( $n_0 = 0, n_1 = 10$ , as in Fig. 2). Overall, the IS proposal (8a) overestimates  
312 the novel-allele probability for samples in which a minority of genes in the original sample  
313 derive from the deme from which the last gene is sampled ( $n_0 \leq 4$ ). For larger values of  $n_0$ ,  
314 the IS proposal underestimates the novel-allele probability, with the exception of the case in  
315 which the entire sample derives from the deme from which the last allele is sampled. Under  
316 some conditions (Fig. 3, for example), this case ( $n_0 = 10$ ) can reverse the trend of declining  
317 novel-allele probabilities, but even so, the IS proposal tends to overestimate the marginal  
318 novel-allele probability. Figure 5 illustrates a similar qualitative pattern for large sample  
319 sizes ( $n = 100$ ), but with higher relative errors.

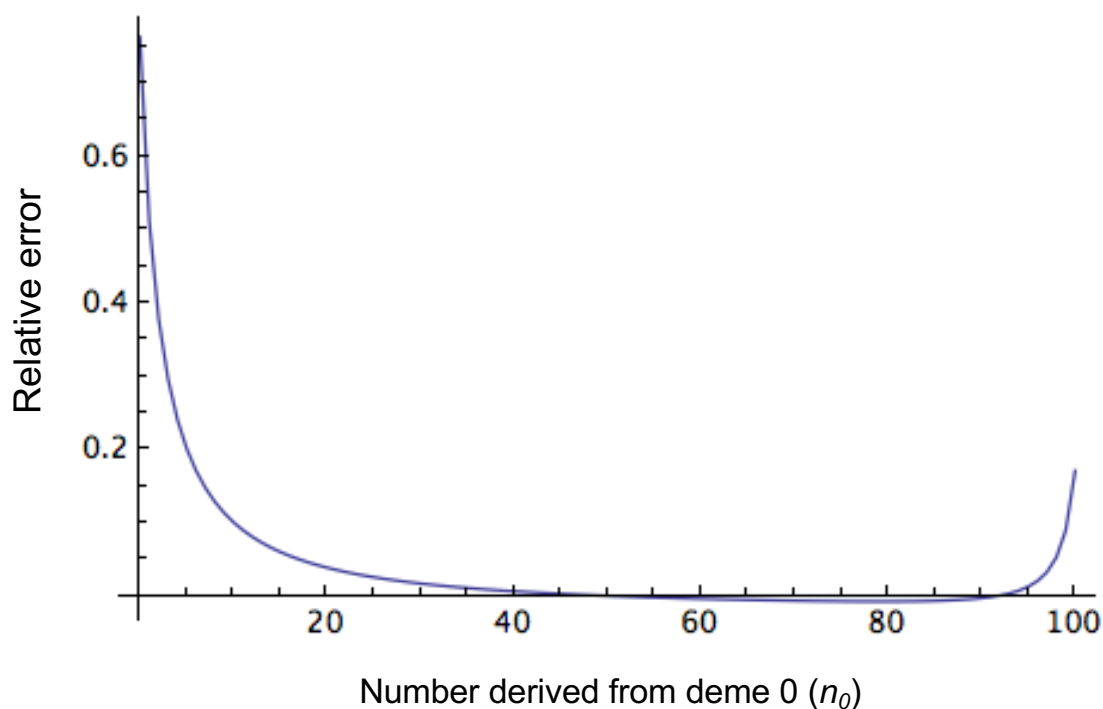

Figure 5: Relative error  $\rho$  (17) between the marginal probability that a gene sampled from deme 0 represents a novel allele (16) and IS proposal (8a), across numbers of genes in the original sample of size  $n = 100$  derived from deme 0 ( $n_0 = 0, 1, \dots, 100$ ), with all other parameters as in Fig. 4.

320 Figure 6 illustrates that the IS proposal (8a) can overestimate by several-fold the marginal  
321 novel-allele probability under asymmetric migration ( $M_0 \neq M_1$ ), especially in cases in which  
322 the entire initial sample derives from the deme (0) from which the last gene is sampled  
323 (blue). For sampling configurations in which the minority of the initial sample derives from  
324 that deme, the IS proposal (8a) can underestimate the marginal for high rates of backward  
325 migration from that deme ( $M_0$ ). Our preliminary explorations suggest that the absolute  
326 magnitude of the relative error diminishes with increases in the scaled mutation rate ( $\theta$ ).

327 To explore whether certain characteristics of the penultimate sample ( $n = 10$ ) may  
328 provide an indication of the novel-allele probability for the last (11<sup>th</sup>) gene, we made pair-  
329 wise comparisons between the novel-allele probability and other features of an AFS using  
330 Kendall's tau statistic, corrected for ties (Puka 2011). The  $i^{\text{th}}$  AFS of the original sample is

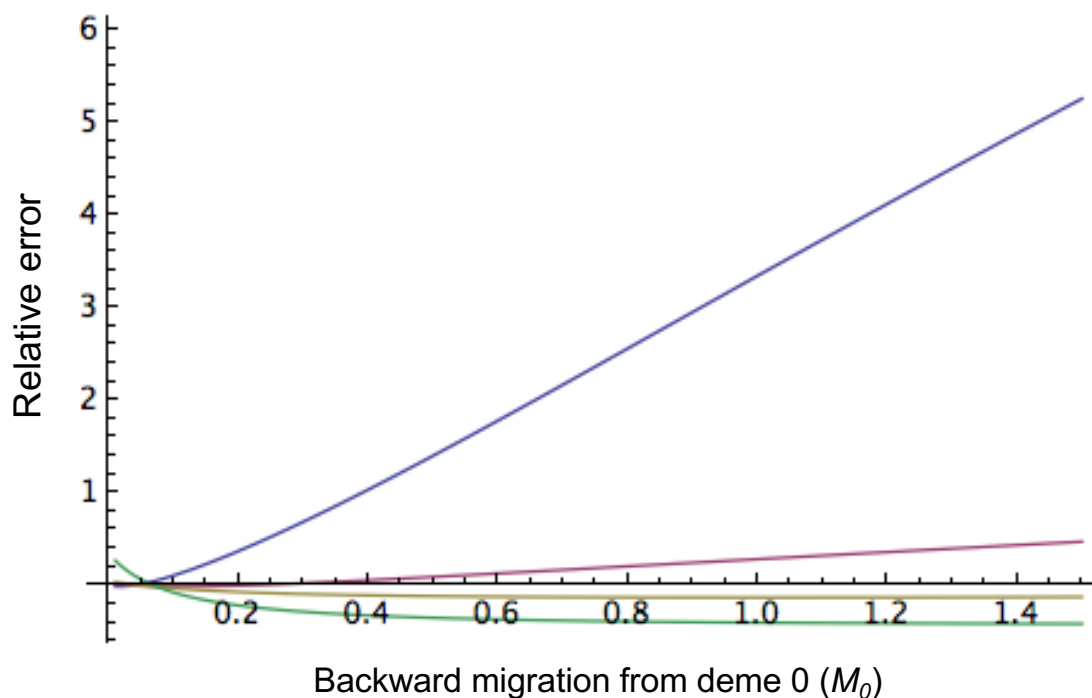

Figure 6: Relative error  $\rho$  (17) between the marginal probability that a gene sampled from deme 0 represents a novel allele (16) and IS proposal (8a), across rates of backward migration from deme 0 ( $M_0$ ), with  $M_1 = 0.05$  and  $\theta = 0.1$  for an initial sample of size  $n = 10$ . Relative error is highest for initial samples derived entirely from deme 0 (blue,  $n_0 = 10$ ), declining and becoming negative for samples with progressively more genes derived from deme 1 (magenta,  $n_0 = 9$ ; yellow,  $n_0 = 5$ ; green,  $n_0 = 0$ ).

331 associated with a novel-allele probability for the last-sampled gene ( $x_i$ ) and also a value ( $y_i$ )  
 332 for another feature: for example,  $y_i$  may correspond to the number of alleles represented in  
 333 the  $i^{\text{th}}$  AFS. If the novel-allele probability and the other feature were perfectly correlated,  
 334 then for all pairs of AFSs ( $i$  and  $j$ ),  $(x_i - x_j)$  and  $(y_i - y_j)$  would have the same sign: an  
 335 increase (decrease) in novel-allele probability is accompanied by an increase (decrease) in the  
 336 other feature. Of the  $\binom{Z}{2}$  pairwise comparisons among  $Z$  AFSs, let  $C$  represent the number  
 337 of pairs for which the differences are concordant (have the same sign) and  $D$  the number of  
 338 discordant pairs (different signs). Let  $T_x$  denote the number of pairs of AFSs that show ties  
 339 for novel-allele probability ( $x_i = x_j$ ) and  $T_y$  the number of pairs that show ties for the other



340 feature ( $y_i = y_j$ ). Kendall's tau-b statistic accommodates such ties:

$$\text{tau-b} = \frac{C - D}{\sqrt{(C + D + T_x)(C + D + T_y)}}. \quad (18)$$

341 Figure 7 presents this statistic for comparisons between novel-allele probability and other  
 342 features for an original sample of size  $n = 10$  under symmetric migration ( $M_0 = M_1$ ),  
 343 with the abscissa ( $n_0 = 0, 1, \dots, 10$ ) indicating the number of genes in the original sample  
 derived from deme 0. Interestingly, the concave-down curve (magenta) suggests that novel-

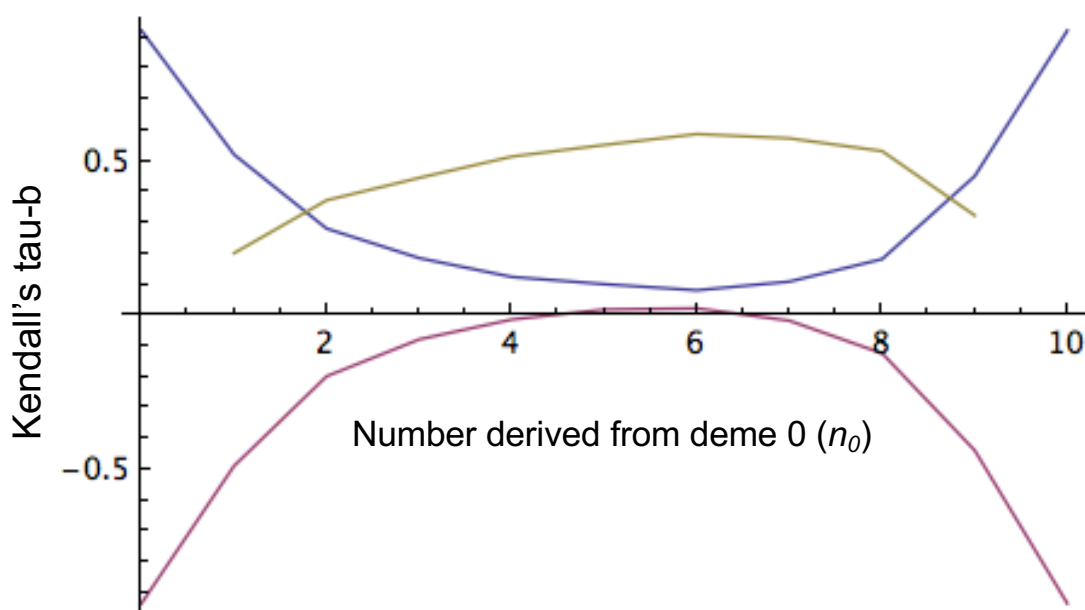

Figure 7: Kendall's tau-b (18) measure of association across AFSs between the probability that an additional gene sampled from deme 0 represents a novel allele for a given AFS and another feature of the AFS for an original sample of size 10 with  $n_0$  genes ( $n_0 = 0, 1, \dots, 10$ ) derived from deme 0, with  $c_0 = c_1 = M_0 = M_1 = 1$  and  $\theta = 0.1$ . The concave-up curve (blue) corresponds to the probability of the original AFS, the concave-down curve (magenta) to the number of alleles observed in the original sample, and the remaining curve to the proportion of alleles observed in only a single deme.

344

345 allele probability tends to show a negative association with number of alleles in the original  
 346 sample for samples in which most of the genes derive from a single deme ( $n_0$  close to 0 or  
 347  $n = 10$ ). For such unbalanced samples, the next-sampled gene is more likely to be novel if  
 348 the original sample comprises fewer distinct alleles, whether or not the last gene derives from

349 the deme from which the majority of the original sample derive. However, little association  
350 is apparent for balanced samples. The concave-up curve (blue) suggests that the novel-allele  
351 probability is generally higher for AFSs that themselves have higher probability, a trend  
352 that persists under higher scaled mutation rates (Fig. 8). The remaining curve suggests  
353 that higher proportions of private alleles (those observed in the subsample derived from  
354 exactly one deme; see Slatkin 1985) tend to be positively associated with higher novel allele  
355 probabilities. Figure 8 suggests that the associations may be strengthened under a higher  
mutation rate ( $\theta = 1.0$ ).

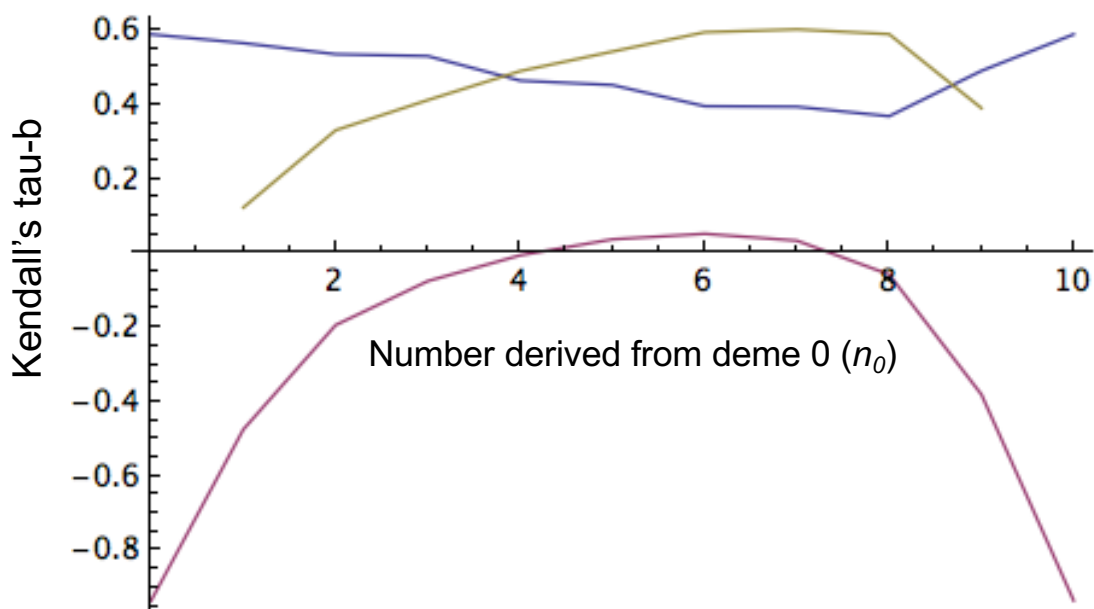

Figure 8: Kendall's tau-b (18) as described for Fig. 7, but with  $\theta = 1.0$ .

356

## 357 5 Discussion

An alternative to the separate proposal of an unlabelled genealogy and then a mutational history conditional on the genealogy entails the proposal of full labelled histories. Our inductive method (Uyenoyama *et al.* 2019) uses the labelled coalescence argument of Karlin and McGregor (1972) to determine the probability of all allele frequency spectra (AFSs) in

structured populations under the infinite-alleles model of mutation. Because the number of AFSs grows rapidly (although slower than exponentially) with sample size ( $n$ ), at the approximate rate

$$e^{\pi\sqrt{2n/3}}/(4\sqrt{3})$$

358 (Bóna 2011, p. 98), the computation of all AFS probabilities is clearly impractical for large  
359 samples. For samples comprising 100 genes derived entirely from a single deme, 190,569,292  
360 distinct AFSs exist (Abramowitz and Stegun 1965, Table 21.5), and the total number, over  
361 all possible sampling configurations, is many orders of magnitude greater. Even so, our  
362 recursive method (16) can determine the exact marginal novel-allele probability for large  
363 samples, including  $n = 100$  (Fig. 5). A similar recursion (Eqn. (14) of Uyenoyama *et al.*  
364 2019) provides the probability generating function of the total number of alleles observed in  
365 samples of a given size.

366 De Iorio and Griffiths and colleagues (see especially De Iorio and Griffiths 2004a,b; De Iorio  
367 *et al.* 2005) have developed a class of importance sampling (IS) proposals for the determi-  
368 nation of likelihoods that can accommodate generalized mutation and migration models in  
369 structured populations. Those IS proposals, which appear to be the most efficient available,  
370 were constructed by extrapolating fundamental properties of the ESF to structured popula-  
371 tions (see Section 3.1). Key to this approach is their approximation of the probability, given  
372 an arbitrary sample AFS, that the next-observed gene represents a novel allelic class. Our  
373 study of this approximation in the simple model explored here (6) suggests that the success  
374 of their IS proposals may reflect in part the similarity of their novel-allele probability (8a)  
375 to the true marginal novel-allele probability (16) across AFSs of the sample prior to the  
376 addition of the last-observed gene.

377 We find that the IS proposal for the novel-allele probability (8a) tends to overestimate  
378 the marginal (16) for cases in which the last-observed gene is drawn from a deme different  
379 from that from which the majority of the sample was derived (Figs. 4 and 5). In such  
380 cases, relatively few of the existing lineages reside in the same deme as the lineage of the

381 last-observed gene. A more ancient coalescence of the lineage of the last-observed gene  
382 allows more time for a mutation to occur in that lineage, tending to increase the novel-allele  
383 probability. While the novel-allele probability is indeed relatively high for such sampling  
384 configurations (*e.g.*, see Fig. 3), the IS proposal (8) favors even higher values. We suggest  
385 that substituting the actual marginal novel-allele probability (16) for (8) and otherwise  
386 preserving the De Iorio and Griffiths (2004b) method for constructing IS proposals may  
387 improve efficiency.

388 Our preliminary explorations of the marginal probability of a novel allele (16) suggest  
389 some additional qualitative trends. Most strikingly, genes derived from a deme different  
390 from that of the majority of the sample have higher probabilities of representing a novel  
391 allelic class (Fig. 3). For unbalanced samples (unequal numbers of genes derived from the  
392 demes), the novel-allele probability tends to show a negative association with the number  
393 of alleles in sample (Figs. 7 and 8): the novel-allele probability is higher for initial samples  
394 comprising fewer alleles. The distribution of allele number (section 2 of Uyenoyama *et al.*  
395 2019) can be used to ascertain whether the number of alleles in the initial sample is low.  
396 In addition, observation in the initial sample of more private alleles (those observed in the  
397 subsample derived from a single deme) appears to be associated with higher novel-allele  
398 probabilities. Observation of private alleles may suggest low migration rates (see Slatkin  
399 1985), again allowing more time for a mutation to occur in the lineage of the last-observed  
400 gene.

## Acknowledgments

We thank Editor Noah Rosenberg and the Editorial Board for the opportunity to contribute to this volume, celebrating the 50<sup>th</sup> anniversary of *Theoretical Population Biology*, the forum in which the Ewens Sampling Formula (Ewens 1972; Karlin and McGregor 1972) and many other works on which we have drawn have appeared. We are grateful to the Editor and

the reviewers for their helpful comments. Public Health Service grant GM 37841 (MKU) provided partial funding for this research.

## References

- Abramowitz, M. and Stegun, I. A., 1965. Handbook of mathematical functions. Dover Publications, Inc., New York.
- Bóna, M., 2011. A walk through combinatorics. World Scientific Publishing Co. Pte. Ltd., New York, third edition.
- De Iorio, M. and Griffiths, R. C., 2004a. Importance sampling on coalescent histories. I. *Adv. Appl. Prob.* **36**, 417–433.
- De Iorio, M. and Griffiths, R. C., 2004b. Importance sampling on coalescent histories. II: Subdivided population models. *Adv. Appl. Prob.* **36**, 434–454.
- De Iorio, M., Griffiths, R. C., Leblois, R., and Rousset, F., 2005. Stepwise mutation likelihood computation by sequential importance sampling in subdivided population models. *Theor. Pop. Biol.* **68**, 41–53.
- Ewens, W. J., 1972. The sampling theory of selectively neutral alleles. *Theor. Pop. Biol.* **3**, 87–112.
- Felsenstein, J., Kuhner, M. K., Yamato, J., and Beerli, P., 1999. Likelihoods on coalescents: A Monte Carlo sampling approach to inferring parameters from population samples of molecular data. In F. Seillier-Moiseiwitsch, ed., *Statistics in Molecular Biology and Genetics*, 163–185. Institute of Mathematical Statistics and American Mathematics Society, Haywood, CA.
- Griffiths, R. C. and Lessard, S., 2005. Ewens’ sampling formula and related formulae:

- combinatorial proofs, extensions to variable population size and applications to ages of alleles. *Theor. Pop. Biol.* **68**, 167–177.
- Griffiths, R. C. and Tavaré, S., 1994a. Ancestral inference in population genetics. *Stat. Sci.* **9**, 307–319.
- Griffiths, R. C. and Tavaré, S., 1994b. Simulating probability distributions in the coalescent. *Theor. Pop. Biol.* **46**, 131–159.
- Hobolth, A., Uyenoyama, M. K., and Wiuf, C., 2008. Importance sampling for the infinite sites model. *Statistical Applications in Genetics and Molecular Biology* **7**, Article 32.
- Hoppe, F. M., 1987. The sampling theory of neutral alleles and an urn model in population genetics. *J. Math. Biol.* **25**, 123–159.
- Hudson, R. R., 1990. Gene genealogies and the coalescent process. In D. Futuyma and J. Antonovics, eds., *Oxford Surveys in Evolutionary Biology*, volume 7, 1–44. Oxford Univ. Press, New York.
- Karlin, S. and McGregor, J., 1972. Addendum to a paper of W. Ewens. *Theor. Pop. Biol.* **3**, 113–116.
- Kingman, J. F. C., 2000. Origins of the coalescent: 1974–1982. *Genetics* **156**, 1461–1463.
- Leman, S. C., Chen, Y., Stajich, J. E., Noor, M. A. F., and Uyenoyama, M. K., 2005. Likelihoods from summary statistics: Recent divergence between species. *Genetics* **171**, 1419–1436.
- Puka, L., 2011. Kendall’s Tau. In M. Lovric, ed., *International Encyclopedia of Statistical Science*, <https://link.springer.com/referencework/10.1007%2F978-3-642-04898-2>. Springer, Berlin.

- Redelings, B. D., Kumagai, S., Tatarenkov, A., Wang, L., Sakai, A. K., Weller, S. G., Culley, T. M., Avise, J. C., and Uyenoyama, M. K., 2015. A Bayesian approach to inferring rates of selfing and locus-specific mutation. *Genetics* **201**, 1171–1188.
- Slatkin, M., 1985. Rare alleles as indicators of gene flow. *Evolution* **81**, 53–65.
- Stephens, M. and Donnelly, P., 2000. Inference in molecular population genetics. *J. R. Statist. Soc. B* **62**, 605–635.
- Tavaré, S., 2004. Ancestral inference in population genetics. In S. Tavaré and O. Zeitouni, eds., *Lectures on Probability Theory and Statistics, Ecole d'Été de Probabilités de Saint-Flour XXXI – 2001*, 1–188. Springer-Verlag, New York.
- Uyenoyama, M. K., Takebayashi, N., and Kumagai, S., 2019. Inductive determination of allele frequency spectrum probabilities in structured populations. *Theor. Pop. Biol.* **129**, 148–159.
- Wiuf, C. and Donnelly, P., 1999. Conditional genealogies and the age of a neutral mutant. *Theor. Pop. Biol.* **56**, 183–201.

## 401 Appendix A ESF recursion

402 In using the labelled coalescence argument (4) to derive the ESF, Karlin and McGregor  
 403 (1972) conditioned on two events: descent of the  $n$  genes in the present sample from  $n - 1$   
 404 distinct genes in the preceding generation, with probability

$$q = \binom{n}{2} / 2N, \quad (\text{A.1})$$

405 and descent from  $n$  distinct genes with the complement probability  $(1 - q)$ . Under the large  
 406  $N$  assumption, all other possible derivations of the sample occur at negligible rates.

For monomorphic samples, which comprise  $n$  copies of a single allele ( $a_n = 1$ ),

$$p(a_n = 1) = qp(a_{n-1} = 1) + (1 - q)p(a_n = 1)(1 - u)^n.$$

Substituting (A.1) and ignoring terms of second order or smaller in rates of coalescence  
 ( $1/2N$ ) or mutation ( $u$ ) yields a familiar expression:

$$p(a_n = 1) = \frac{n - 1}{n - 1 + \theta} p(a_{n-1} = 1),$$

407 in which the  $(n - 1)/(n - 1 + \theta)$  term represents the probability that the most recent event  
 408 ( $T$ ) corresponds to the coalescence of a pair of lineages. Substitution of (1) verifies the ESF  
 409 in this case.

410 For samples comprising more than a single allele ( $a_n = 0$ ), the recursion corresponds to

$$p_n(\mathbf{a}) = \frac{n - 1}{n - 1 + \theta} \sum_i p_{n-1}(\mathbf{a} + \mathbf{e}_i - \mathbf{e}_{i+1}) \frac{i(a_i + 1)}{n - 1} + \frac{\theta}{n - 1 + \theta} \left[ p_n(\mathbf{a}) \frac{a_1}{n} + \sum_i p_n(\mathbf{a} + \mathbf{e}_{i+1} - \mathbf{e}_1 - \mathbf{e}_i) \frac{(i + 1)(a_{i+1} + 1)}{n} \right] \quad (\text{A.2a})$$

411 in which  $\mathbf{e}_i$  denotes a unit vector, with unity in the  $i^{\text{th}}$  position and zeros elsewhere and



412 unmeaningful expressions (*e.g.*, probability of spectra with negative elements) are defined  
413 as zero (Karlin and McGregor 1972). The first term on the right of (A.2a) corresponds to  
414 the splitting of an allelic lineage (in an ancestral sample of size  $n - 1$ ) as the most recent  
415 evolutionary event ( $T$ ) and the bracketed term to mutation (in an ancestral sample of size  
416  $n$ ). Mutation in a singleton allele preserves the AFS  $\mathbf{a}$ , mutation in an allele represented  
417 exactly twice generates two additional singletons, and mutation in an allele represented  $i$   
418 times ( $i > 2$ ) generates one singleton and reduces the multiplicity of the allele to  $i - 1$ .  
419 Rearrangement of (A.2a) produces

$$p_n(\mathbf{a}) = \frac{n}{n(n-1) + \theta(n-a_1)} \sum_i p_{n-1}(\mathbf{a} + \mathbf{e}_i - \mathbf{e}_{i+1}) i(a_i + 1) + \frac{\theta}{n(n-1) + \theta(n-a_1)} \left[ \sum_i p_n(\mathbf{a} + \mathbf{e}_{i+1} - \mathbf{e}_1 - \mathbf{e}_i) (i+1)(a_{i+1} + 1) \right]. \quad (\text{A.2b})$$

420 Tavaré (2004, his equation (3.5.2)) has derived an identical equation. Substitution of (1)  
421 verifies the ESF as a solution.

## 422 **Appendix B Probability that the last-sampled gene rep-** 423 **resents a novel allele**

Here, we use the conditional probability interpretation of ratios of AFS probabilities (5) noted by Karlin and McGregor (1972) to provide an alternative derivation of the probability (3a) that the next-sampled ( $n^{\text{th}}$ ) gene represents a novel allele:

$$\pi_{n-1} = \frac{\theta}{\theta + n - 1}.$$

424 Dividing both sides of fundamental recursion (A.2b) by  $p_n(\mathbf{a})$ , we obtain:

$$\begin{aligned}
 1 = & \frac{n}{n(n-1) + \theta(n-a_1)} \sum_i \frac{p_{n-1}(\mathbf{a} + \mathbf{e}_i - \mathbf{e}_{i+1})}{p_n(\mathbf{a})} i(a_i + 1) \\
 & + \frac{\theta}{n(n-1) + \theta(n-a_1)} \left[ \frac{p_n(\mathbf{a} + \mathbf{e}_2 - 2\mathbf{e}_1)}{p_n(\mathbf{a})} 2(a_2 + 1) \right. \\
 & \left. + \sum_{i>2} \frac{p_n(\mathbf{a} + \mathbf{e}_{i+1} - \mathbf{e}_1 - \mathbf{e}_i)}{p_n(\mathbf{a})} (i+1)(a_{i+1} + 1) \right]. \tag{B.1}
 \end{aligned}$$

We denote the probability that the last-sampled gene represents an allele that occurs in the full sample with multiplicity  $i$  by

$$\phi(a_i, \mathbf{a}).$$

For any non-singleton in the full sample,

$$\phi(a_{i+1}, \mathbf{a}) = \frac{p_n(\mathbf{a})}{p_{n-1}(\mathbf{a} + \mathbf{e}_i - \mathbf{e}_{i+1})} \left[ \frac{(i+1)a_{i+1}}{n} \right],$$

in which the second factor reflects the probability that one of the genes representing an allele with multiplicity  $i+1$  in the full sample is sampled last (compare (5)). An alternative expression conditions on the last-sampled gene representing an allelic type already observed among the first  $n-1$  genes:

$$\phi(a_{i+1}, \mathbf{a}) = (1 - \pi_{n-1}) \frac{i(a_i + 1)}{n-1},$$

425 in which the second factor reflects that the allelic class of the last-sampled gene corresponds  
 426 to the class of a gene sampled uniformly at random from the sample at size  $n-1$ . Equating  
 427 these expressions for  $\phi(a_{i+1}, \mathbf{a})$  yields

$$\frac{p_{n-1}(\mathbf{a} + \mathbf{e}_i - \mathbf{e}_{i+1})}{p_n(\mathbf{a})} = \frac{n-1}{n(1 - \pi_{n-1})} \left[ \frac{(i+1)a_{i+1}}{i(a_i + 1)} \right], \tag{B.2}$$

428 the ratio of AFS probabilities in the first summation of (B.1).

429 The second ratio of AFS probabilities in (B.1) corresponds to a product of conditional  
 430 probabilities:

$$\frac{p_n(\mathbf{a} + \mathbf{e}_2 - 2\mathbf{e}_1)}{p_n(\mathbf{a})} = \frac{p_n(\mathbf{a} + \mathbf{e}_2 - 2\mathbf{e}_1)}{p_{n-1}(\mathbf{a} - \mathbf{e}_1)} \frac{p_{n-1}(\mathbf{a} - \mathbf{e}_1)}{p_n(\mathbf{a})}. \quad (\text{B.3})$$

The probability that the last-sampled gene represents a doubleton allele in a full sample with AFS  $\mathbf{a} + \mathbf{e}_2 - 2\mathbf{e}_1$  is

$$\phi(a_2, \mathbf{a} + \mathbf{e}_2 - 2\mathbf{e}_1) = \frac{p_n(\mathbf{a} + \mathbf{e}_2 - 2\mathbf{e}_1)}{p_{n-1}(\mathbf{a} - \mathbf{e}_1)} \left[ \frac{2(a_2 + 1)}{n} \right].$$

This expression is also equal to the probability that the last-sampled gene is not novel relative to the penultimate sample ( $1 - \pi_{n-1}$ ) and belongs to an allelic class already represented by a singleton:

$$\phi(a_2, \mathbf{a} + \mathbf{e}_2 - 2\mathbf{e}_1) = (1 - \pi_{n-1}) \frac{a_1 - 1}{n - 1}.$$

Equating these expressions yields

$$\frac{p_n(\mathbf{a} + \mathbf{e}_2 - 2\mathbf{e}_1)}{p_{n-1}(\mathbf{a} - \mathbf{e}_1)} = (1 - \pi_{n-1}) \left[ \frac{n(a_1 - 1)}{2(a_2 + 1)(n - 1)} \right].$$

431 Substitution of this expression and (5) into (B.3) produces

$$\frac{p_n(\mathbf{a} + \mathbf{e}_2 - 2\mathbf{e}_1)}{p_n(\mathbf{a})} = \frac{1 - \pi_{n-1}}{\pi_{n-1}} \left[ \frac{a_1(a_1 - 1)}{2(a_2 + 1)(n - 1)} \right]. \quad (\text{B.4})$$

432 The final ratio of AFS probabilities in (B.1) corresponds to

$$\frac{p_n(\mathbf{a} - \mathbf{e}_1 - \mathbf{e}_{i-1} + \mathbf{e}_i)}{p_n(\mathbf{a})} = \frac{p_n(\mathbf{a} - \mathbf{e}_1 - \mathbf{e}_{i-1} + \mathbf{e}_i)}{p_{n-1}(\mathbf{a} - \mathbf{e}_1)} \frac{p_{n-1}(\mathbf{a} - \mathbf{e}_1)}{p_n(\mathbf{a})}. \quad (\text{B.5})$$

Once again, we have two expressions for the probability that the last-sampled gene represents

an allele with multiplicity  $i$  in a sample of size  $n$  with AFS  $\mathbf{a} - \mathbf{e}_1 - \mathbf{e}_{i-1} + \mathbf{e}_i$ :

$$\begin{aligned}\phi(a_i + 1, \mathbf{a} - \mathbf{e}_1 - \mathbf{e}_{i-1} + \mathbf{e}_i) &= \frac{p(\mathbf{a} - \mathbf{e}_1 - \mathbf{e}_{i-1} + \mathbf{e}_i)}{p(\mathbf{a} - \mathbf{e}_1)} \left[ \frac{i(a_i + 1)}{n} \right] \\ &= (1 - \pi_{n-1}) \frac{(i-1)a_{i-1}}{n-1}.\end{aligned}$$

433 Together with (5), these expressions produce

$$\frac{p(\mathbf{a} - \mathbf{e}_1 - \mathbf{e}_{i-1} + \mathbf{e}_i)}{p(\mathbf{a})} = \frac{1 - \pi_{n-1}}{\pi_{n-1}} \left[ \frac{a_1 a_{i-1} (i-1)}{i(a_i + 1)(n-1)} \right]. \quad (\text{B.6})$$

434 Substitution of (B.2), (B.4), and (B.6) into (B.1) produces a quadratic in  $\pi_{n-1}$ :

$$[(n-1 + \theta)\pi_{n-1} - \theta](n\pi_{n-1} - a_1) = 0. \quad (\text{B.7})$$

435 Ewens's (1972) expression (3a) for the probability of sampling novel allele on the  $n^{\text{th}}$  draw  
436 is indeed a root of this equation. The second root, independent of the scaled mutation  
437 parameter  $\theta$ , simply represents the probability that the last-sampled gene in a sample of  
438 size  $n$  is one of the  $a_1$  singletons ( $a_1/n$ ). As it is clear that the novel-allele probability must  
439 depend on  $\theta$ , the first root is this probability.

## 440 Appendix C Proposing an ancestor given the descen- 441 dant under the ESF

442 The most efficient IS proposal for generating the genealogical history of the sample would  
443 incorporate the actual distribution of ancestor  $A$  in which the most recent evolutionary event  
444 occurs, given descendant  $D$ :

$$\Pr(A = \mathbf{b} | D = \mathbf{a}) = \frac{\Pr(D = \mathbf{a} | A = \mathbf{b}) \Pr(A = \mathbf{b})}{\Pr(D = \mathbf{a})}. \quad (\text{C.1})$$

445 While determining the conditional probability of descendant  $D$  given ancestor  $A$  is straight-  
 446 forward, this expression illustrates that determination of the reverse conditional probability  
 447 is tantamount to full solution of the likelihood recursion (Stephens and Donnelly 2000).

448 Observation of  $D$  excludes certain AFSs from consideration as  $A$ : for example, AFSs  
 449 that require more than one evolutionary event to be transformed into  $D$  have  $\Pr(D|A) = 0$ .  
 450 However, the conditional distribution of  $A$  is not uniform over non-excluded ancestral states.  
 451 To explore a means of proposing  $A$  from  $D$ , Hobolth *et al.* (2008) examined the conditional  
 452 distribution (C.1) under the ESF (1):

$$P(A = \mathbf{b}|D = \mathbf{a}) = \begin{cases} \frac{ja_j}{n} & \text{for } \mathbf{b} = \mathbf{a} + \mathbf{e}_{j-1} - \mathbf{e}_j, j \geq 2 \\ \frac{a_1}{n} \left( \frac{a_1-1}{n-1+\theta} \right) & \text{for } \mathbf{b} = \mathbf{a} + \mathbf{e}_2 - 2\mathbf{e}_1 \\ \frac{a_1}{n} \left( \frac{ja_j}{n-1+\theta} \right) & \text{for } \mathbf{b} = \mathbf{a} + \mathbf{e}_{j+1} - \mathbf{e}_1 - \mathbf{e}_j, j \geq 2 \\ \frac{a_1}{n} \left( \frac{\theta}{n-1+\theta} \right) & \text{for } \mathbf{b} = \mathbf{a}. \end{cases} \quad (\text{C.2})$$

453 These expressions suggest choosing a gene uniformly at random from the sample as the  
 454 lineage that participated in the most recent event. This gene either occurs in the sample  
 455 with multiplicity greater than or equal to 2 or is a singleton. With probability  $ja_j/n$ , the  
 456 chosen gene represents an allele that occurs in the sample in multiplicity  $j$  ( $j \geq 2$ ). In this  
 457 case, the most recent event must have been a coalescence between that lineage and another  
 458 representative of the same allelic class, which implies  $\mathbf{b} = \mathbf{a} + \mathbf{e}_{j-1} - \mathbf{e}_j$ .

Alternatively, with probability  $a_1/n$ , the focal gene represents a singleton allele, newly-  
 arisen by mutation. Using that all sampling orders are equiprobable, we regard the focal gene  
 as the last-sampled gene. Immediately ancestral to the mutational event that created the  
 allelic class of the focal gene, the focal lineage represented a singleton allele with probability  
 $\theta/(n-1+\theta)$ . In this case, the state of the ancestor was  $\mathbf{b} = \mathbf{a}$ . Otherwise, with probability  
 $(n-1)/(n-1+\theta)$ , the focal lineage shared its allelic class with at least one of the other  
 $n-1$  lineages. To determine the allelic class of the focal lineage, we choose a gene uniformly

at random from the other  $n - 1$  lineages and assume the focal gene shares its allelic class. A singleton allele relative to the  $n - 1$  non-focal lineages is chosen with probability  $(a_1 - 1)/(n - 1)$ , implying that the focal gene represented a doubleton allele immediately ancestral to the most recent event (mutation). Accordingly,  $A = \mathbf{a} + \mathbf{e}_2 - 2\mathbf{e}_1$  with probability

$$\frac{a_1}{n} \left( \frac{n - 1}{n - 1 + \theta} \right) \frac{a_1 - 1}{n - 1} = \frac{a_1}{n} \left( \frac{a_1 - 1}{n - 1 + \theta} \right).$$

With probability  $ja_j/(n - 1)$ , the gene chosen from the  $n - 1$  non-focal lineages represents an allele with multiplicity  $j \geq 2$ , which implies that  $A = \mathbf{a} + \mathbf{e}_{j+1} - \mathbf{e}_1 - \mathbf{e}_j$  with probability

$$\frac{a_1}{n} \left( \frac{n - 1}{n - 1 + \theta} \right) \frac{ja_j}{n - 1} = \frac{a_1}{n} \left( \frac{ja_j}{n - 1 + \theta} \right).$$

## 459 **Figure captions**

460 **Figure 1.** Topology consistent with observation of fixed mutational differences between sub-  
461 samples derived from each of two species (red and blue). Mutations arising on the branch  
462 labelled  $f/a$  are fixed ( $f$ ) in the subsample derived from the red species and absent ( $a$ ) from  
463 the subsample derived from the blue species. Similarly, mutations arising on the branch  
464 labelled  $a/f$  occur only in the subsample derived from the blue species.

465

466 **Figure 2.** Ranked novel-allele probabilities across AFSs under  $\theta = 0.5$ ,  $M_0 = M_1 = 0.1$ ,  
467  $c_0 = c_1 = 1$ ,  $n_0 = 0$ ,  $n_1 = 10$ . Horizontal lines correspond to the marginal novel-allele  
468 probability across AFSs (blue (16)), the ESF probability for panmictic populations (black  
469 (3a)), the ESF probability with a proposed effective  $\theta$  (green), and the De Iorio and Griffiths  
470 (2004b) IS proposal (red (8a)).

471

472 **Figure 3.** Novel-allele probabilities across AFSs under  $\theta = 0.1$ ,  $M_0 = M_1 = c_0 = c_1 = 1.0$ ,  
473  $n_0 + n_1 = 10$  across initial sample configurations ( $n_0 = 0, 1, \dots, 10$ ). All histograms have 10  
474 bins, with bar width proportional to the sum of the probabilities of the AFSs that contribute  
475 to each bin.

476

477 **Figure 4.** Relative error  $\rho$  (17) between the marginal probability that a gene sampled from  
478 deme 0 represents a novel allele (16) and IS proposal (8a), across initial sampling configura-  
479 tions in which  $n_0$  genes derive from deme 0 ( $n_0 = 0, 1, \dots, 10$ ), with  $\theta = 0.5$ ,  $M_0 = M_1 = 0.1$ ,  
480 and  $c_0 = c_1 = 1$ .

481

482 **Figure 5.** Relative error  $\rho$  (17) between the marginal probability that a gene sampled from  
483 deme 0 represents a novel allele (16) and IS proposal (8a), across numbers of genes in the  
484 original sample of size  $n = 100$  derived from deme 0, for symmetric backward migration  
485 rates  $M_0 = M_1 = 0.5$  and  $\theta = 0.5$ .

486

487 **Figure 6.** Relative error  $\rho$  (17) between the marginal probability that a gene sampled from  
488 deme 0 represents a novel allele (16) and IS proposal (8a), across rates of backward migra-  
489 tion from deme 0 ( $M_0$ ), with  $M_1 = 0.05$  and  $\theta = 0.1$  for an initial sample of size  $n = 10$ .  
490 Relative error is highest for initial samples derived entirely from deme 0 (blue), declining and  
491 becoming negative for samples with progressively more genes derived from deme 1 (other  
492 curves).

493

494 **Figure 7.** Kendall's tau-b (18) measure of association across AFSs between the probability  
495 that an additional gene sampled from deme 0 represents a novel allele for a given AFS and  
496 another feature of the AFS for an original sample of size 10 with  $n_0$  genes ( $n_0 = 0, 1, \dots, 10$ )  
497 derived from deme 0, with  $c_0 = c_1 = M_0 = M_1 = 1$  and  $\theta = 0.1$ . The concave-up curve  
498 (blue) corresponds to the probability of the original AFS, the concave-down curve (ma-  
499 genta) to the number of alleles observed in the original sample, and the remaining curve to  
500 the proportion of alleles observed in only a single deme.

501

502 **Figure 8.** Kendall's tau-b (18) as described for Fig. 7, but with  $\theta = 1.0$ .



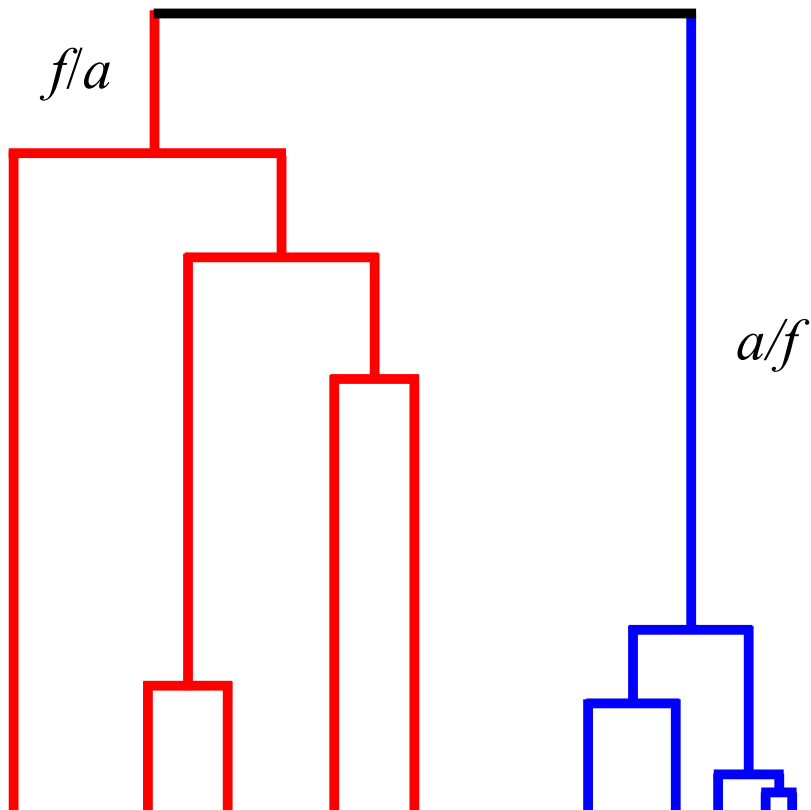

Figure 1: Topology consistent with observation of fixed mutational differences between subsamples derived from each of two species (red and blue). Mutations arising on the branch labelled  $f/a$  are fixed ( $f$ ) in the subsample derived from the red species and absent ( $a$ ) from the subsample derived from the blue species. Similarly, mutations arising on the branch labelled  $a/f$  occur only in the subsample derived from the blue species.

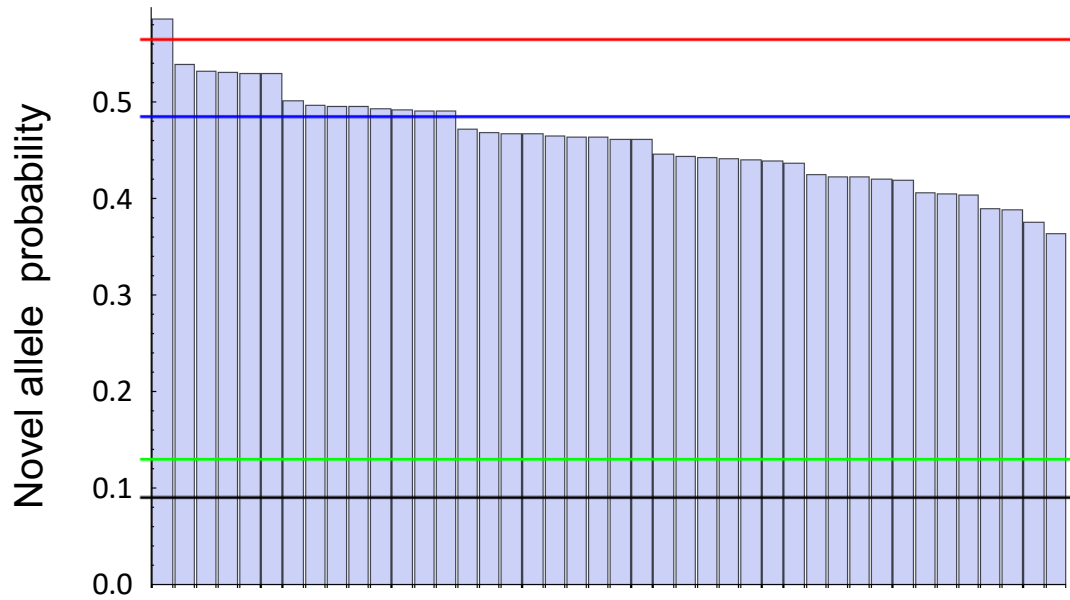

Figure 2: Ranked novel-allele probabilities across AFSs under  $\theta = 0.5$ ,  $M_0 = M_1 = 0.1$ ,  $c_0 = c_1 = 1$ ,  $n_0 = 0$ ,  $n_1 = 10$ . Horizontal lines correspond to the marginal novel-allele probability across AFSs (blue (16)), the ESF probability for panmictic populations (black (3a)), the ESF probability with a proposed effective  $\theta$  (green), and the De Iorio and Griffiths (2004b) IS proposal (red (8a)).

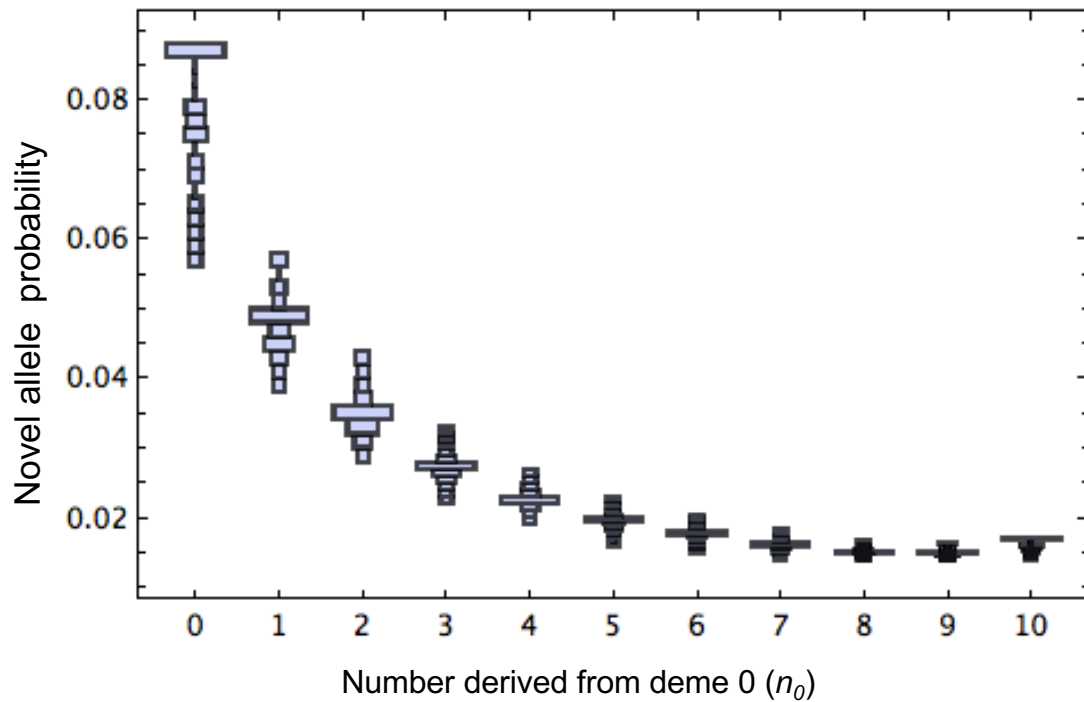

Figure 3: Novel-allele probabilities across AFSs under  $\theta = 0.1$ ,  $M_0 = M_1 = c_0 = c_1 = 1.0$ ,  $n_0 + n_1 = 10$  across initial sample configurations ( $n_0 = 0, 1, \dots, 10$ ). All histograms have 10 bins, with bar width proportional to the sum of the probabilities of the AFSs that contribute to each bin.

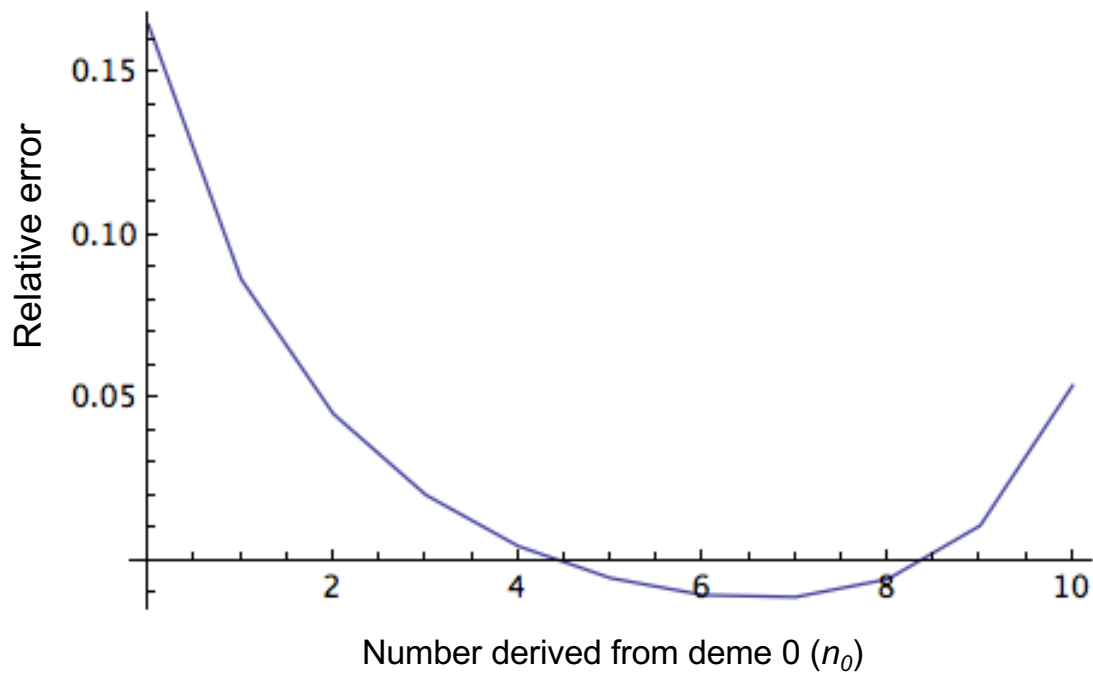

Figure 4: Relative error  $\rho$  (17) between the marginal probability that a gene sampled from deme 0 represents a novel allele (16) and IS proposal (8a), across initial sampling configurations in which  $n_0$  genes derive from deme 0 ( $n_0 = 0, 1, \dots, 10$ ), with  $\theta = 0.5$ ,  $M_0 = M_1 = 0.1$ , and  $c_0 = c_1 = 1$ .

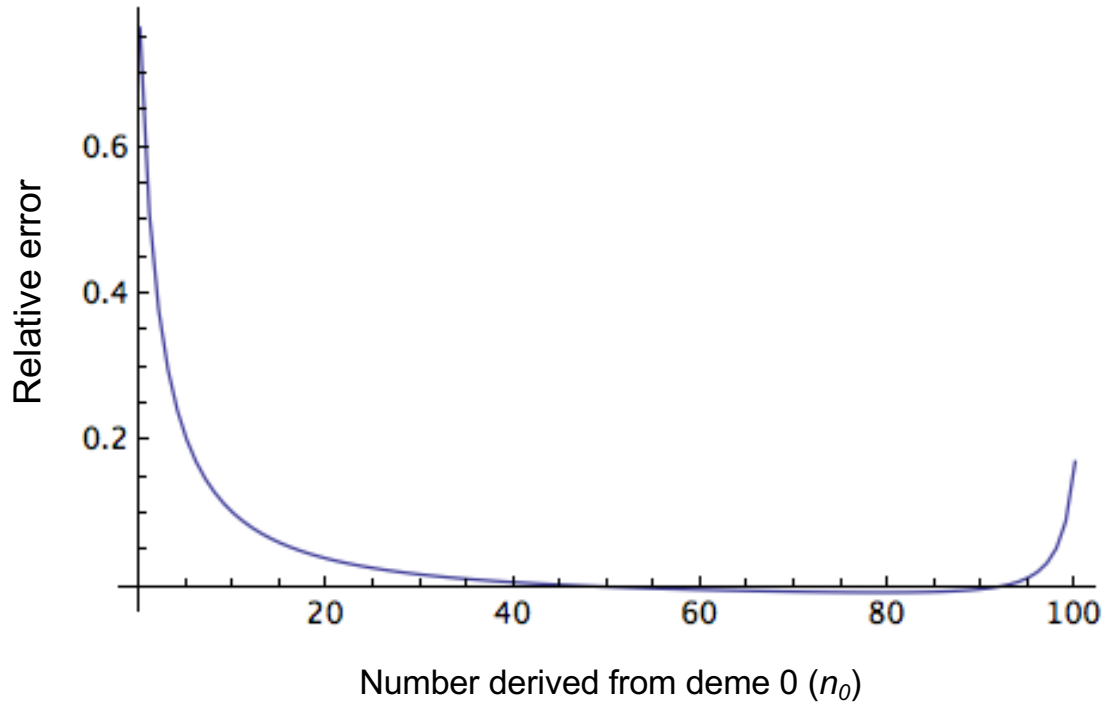

Figure 5: Relative error  $\rho$  (17) between the marginal probability that a gene sampled from deme 0 represents a novel allele (16) and IS proposal (8a), across numbers of genes in the original sample of size  $n = 100$  derived from deme 0, for symmetric backward migration rates  $M_0 = M_1 = 0.5$  and  $\theta = 0.5$ .

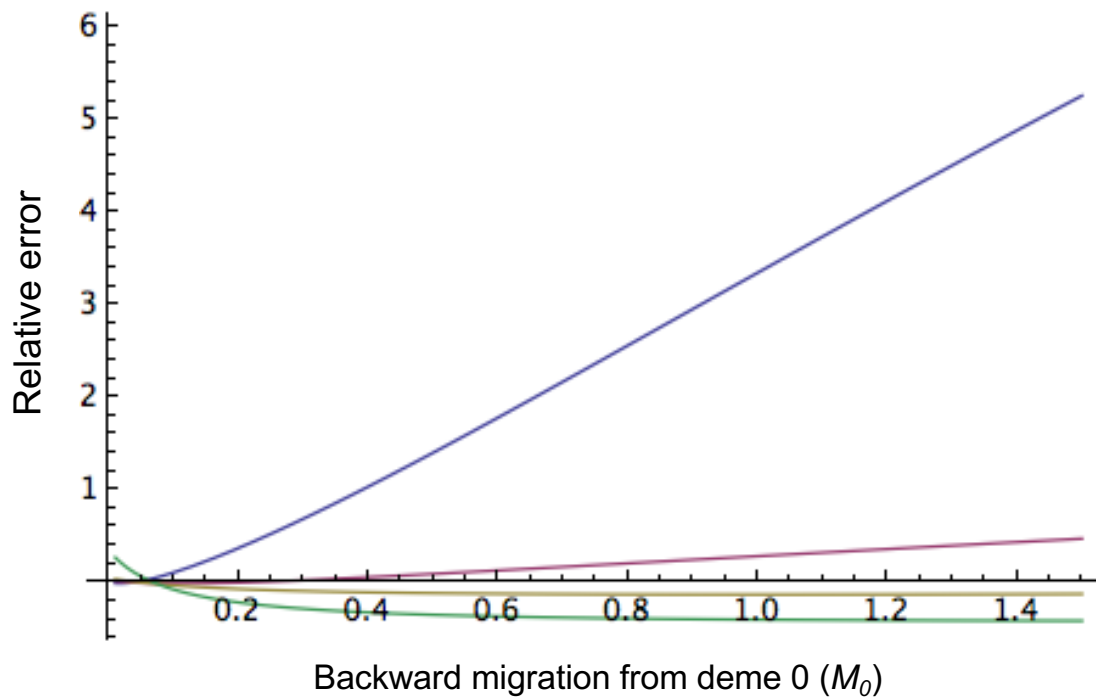

Figure 6: Relative error  $\rho$  (17) between the marginal probability that a gene sampled from deme 0 represents a novel allele (16) and IS proposal (8a), across rates of backward migration from deme 0 ( $M_0$ ), with  $M_1 = 0.05$  and  $\theta = 0.1$  for an initial sample of size  $n = 10$ . Relative error is highest for initial samples derived entirely from deme 0 (blue), declining and becoming negative for samples with progressively more genes derived from deme 1 (other curves).

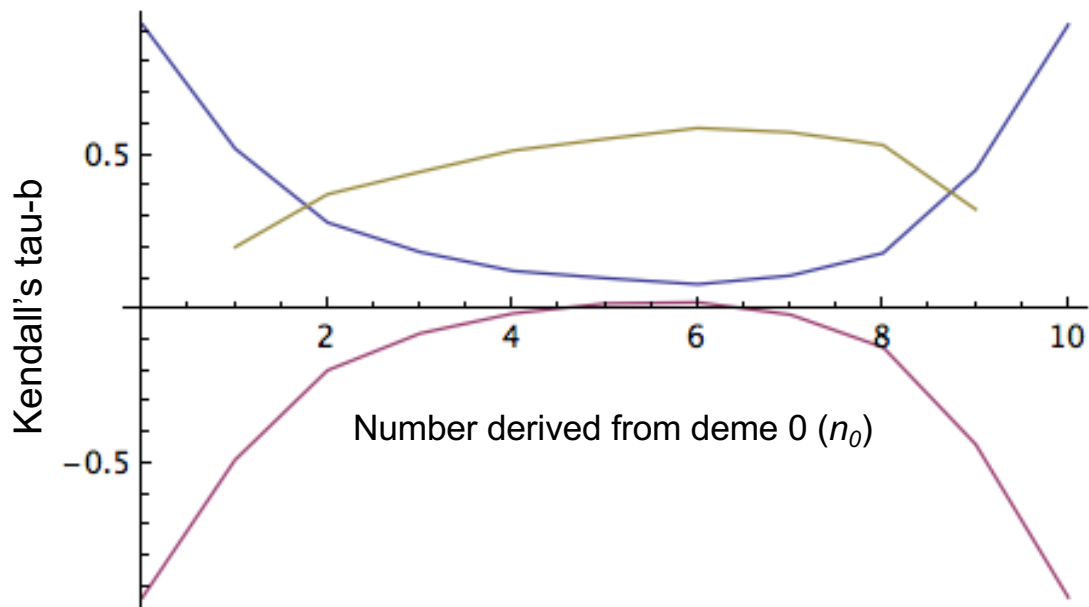

Figure 7: Kendall's tau-b (18) measure of association across AFSs between the probability that an additional gene sampled from deme 0 represents a novel allele for a given AFS and another feature of the AFS for an original sample of size 10 with  $n_0$  genes ( $n_0 = 0, 1, \dots, 10$ ) derived from deme 0, with  $c_0 = c_1 = M_0 = M_1 = 1$  and  $\theta = 0.1$ . The concave-up curve (blue) corresponds to the probability of the original AFS, the concave-down curve (magenta) to the number of alleles observed in the original sample, and the remaining curve to the proportion of alleles observed in only a single deme.

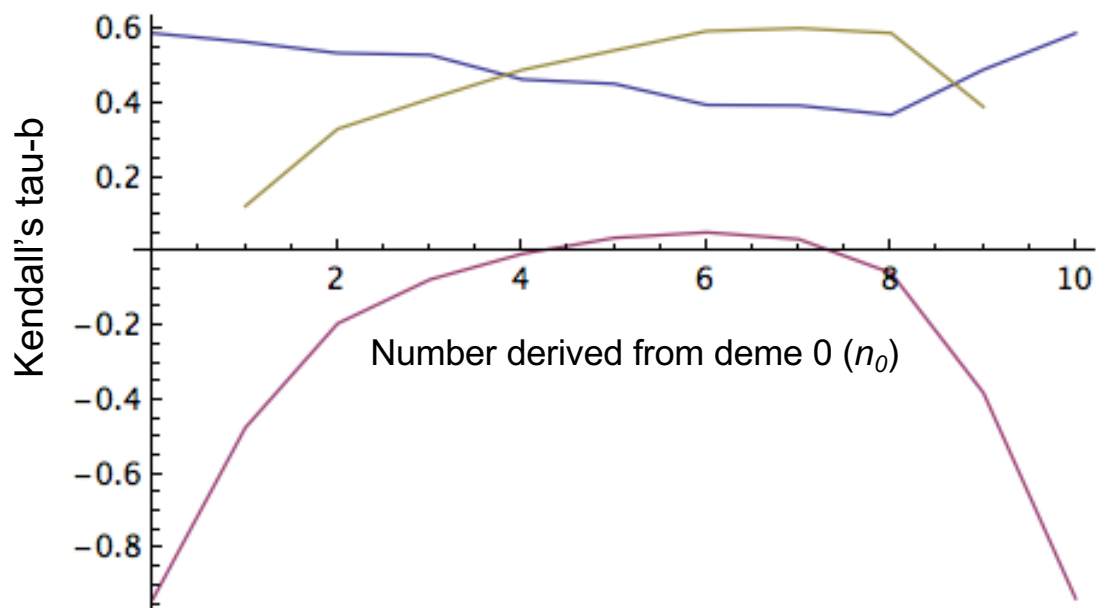

Figure 8: Kendall's tau-b (18) as described for Fig. 7, but with  $\theta = 1.0$ .
